# Human iPSC-derived cerebral organoids model features of Leigh Syndrome and reveal abnormal corticogenesis

Alejandra I. Romero-Morales<sup>1</sup>, Anuj Rastogi<sup>1</sup>, Hoor Temuri<sup>1</sup>, Megan L. Rasmussen<sup>1</sup>, Gregory Scott McElroy<sup>3</sup>, Lawrence Hsu<sup>2</sup>, Paula M. Almonacid<sup>4</sup>, Bryan A. Millis<sup>1</sup>, Navdeep S. Chandel<sup>3,5</sup>, Jean-Philippe Cartailier<sup>2</sup> and Vivian Gama<sup>1,2,6</sup>

<sup>1</sup>Vanderbilt University, Cell and Developmental Biology, Nashville, TN.

<sup>2</sup>Vanderbilt University, Creative Data Solutions, Vanderbilt Center for Stem Cell Biology, Nashville, TN

<sup>3</sup>Northwestern University, Feinberg School of Medicine Department of Medicine Division of Pulmonary and Critical Care Medicine, Chicago, IL

<sup>4</sup>Universidad EAFIT, School of Economics and Finances, Colombia

<sup>5</sup>Northwestern University, Feinberg School of Medicine Department of Biochemistry and Molecular Genetics, Chicago, IL

<sup>6</sup>Vanderbilt University, Vanderbilt Brain Institute, Nashville, TN

## Corresponding author

*Correspondence should be addressed to:*

Vivian Gama  
PMB407935  
465 21<sup>st</sup> Avenue South, 4150A  
Vanderbilt University  
Nashville, TN 37240-7935  
Tel: (615) 875-9490  
[vivian.gama@vanderbilt.edu](mailto:vivian.gama@vanderbilt.edu)

**Running title:** Modeling the effect of Leigh syndrome-associated mutations using human cerebral organoids

**Keywords:** Leigh syndrome, stem cells, glycolysis, oxidative phosphorylation, mitochondria, neural precursor cells, neural rosettes, brain organoids

52 **Summary**

53 Leigh syndrome (LS) is a rare, inherited neuro-metabolic disorder that presents with bilateral brain  
54 lesions. This disease is caused by defects in the mitochondrial respiratory chain and associated  
55 nuclear-encoded proteins. We generated induced pluripotent stem cells (iPSCs) from three widely  
56 available LS fibroblast lines and identified, through whole exome and mitochondrial sequencing,  
57 unreported mutations in pyruvate dehydrogenase (GM0372, PDH; GM13411, MT-ATP6/PDH)  
58 and dihydrolipoyl dehydrogenase (GM01503, DLD). LS derived cell lines were viable and able to  
59 differentiate into key progenitor populations, but we identified several abnormalities in three-  
60 dimensional differentiation models of brain development. The DLD-mutant line showed decreased  
61 neural rosette (NR) formation, and there were differences in NR lumen area in all three LS lines  
62 compared to control. LS-derived cerebral organoids showed defects in neural epithelial bud  
63 generation and reduced size when grown for 100 days. Loss of cortical architecture and markers  
64 were detected at days 30 and 100. The MT-ATP6/PDH line produced organoid neural progenitor  
65 cells with an abnormal mitochondrial morphology characterized by fragmentation and  
66 disorganization, and demonstrated increased generation of astrocytes. These studies aim to  
67 provide a comprehensive phenotypic characterization of available patient-derived cell lines that  
68 could be used as LS model systems.

69

## 70 **Introduction**

71 Leigh syndrome (LS), or sub-acute necrotizing encephalomyelopathy, is an inherited neuro-  
72 metabolic disorder that affects the central nervous system (CNS) (Baertling et al., 2014; Gerards  
73 et al., 2016; Leigh, 1951; Sorbi and Blass, 1982). LS is a rare, progressive, early-onset disease  
74 with a prevalence of 1 in 40,000 live births (Lake et al., 2016). The pathologic features of LS are  
75 focal, bilateral lesions in one or more areas of the CNS, including the brainstem, thalamus, basal  
76 ganglia, cerebellum, and spinal cord. The most common underlying cause is defective oxidative  
77 phosphorylation (OXPHOS), due to mutations in genes encoding complexes of the mitochondrial  
78 respiratory chain (Baertling et al., 2014; Lake et al., 2015, 2016). The LS phenotype caused by  
79 mitochondrial-encoded gene mutations can be rescued by mitochondrial replacement,  
80 highlighting the importance of this organelle in LS disease progression (Ma et al., 2015).

81 The availability of animal models and brain tissue from biopsies has provided critical insight  
82 into this disease. However, our understanding of the etiology and pathology of complex  
83 neurological diseases like LS would benefit from human-derived platforms such as an induced  
84 pluripotent stem cell- derived model (Quadrato et al., 2016). The ability to reprogram somatic cells  
85 into induced pluripotent stem cells (iPSCs), followed by differentiation into specific lineages has  
86 become an useful tool for complex disease modeling (Kelava and Lancaster, 2016; Di Lullo and  
87 Kriegstein, 2017). In the context of LS, iPSCs have been successfully generated from patients  
88 with mutations in Mitochondrially Encoded ATP Synthase Membrane Subunit 6 (MT-ATP6)  
89 (Galera-Monge et al., 2016; Grace et al., 2019; Lorenz et al., 2017; Ma et al., 2015),  
90 Mitochondrially Encoded NADH:Ubiquinone Oxidoreductase Core Subunit 3 (MT-ND3) subunit  
91 (Hattori et al., 2016) and the nuclear encoded gene Surfeit locus protein 1 (SURF1) (Inak et al.,  
92 2019). These iPSC-model systems have been proposed for drug discovery (Inak et al., 2017;  
93 Lorenz et al., 2017) as well as testing platforms for potential metabolic rescue treatments (Ma et  
94 al., 2015).

95 Many studies have used LS patient fibroblasts commercially available at the Coriell Institute.  
96 This repository provides scientists around the world with resources for cell and genetic research.  
97 Here we report our findings on the genomic and phenotypic characterization of iPSCs derived  
98 from three LS fibroblast lines available at Coriell. Whole exome and mitochondrial sequencing  
99 revealed previously unidentified mutations in these patient-derived cell lines. While these LS  
100 mutations had no effects on pluripotency, trilineage differentiation, or apoptotic sensitivity, three-  
101 dimensional differentiation into neural rosettes and cerebral organoids resulted in severe  
102 abnormalities. LS-iPSC-derived 100-day cerebral organoids showed decreased size as well as  
103 defects in the generation of neural epithelial buds. Corticogenesis was impaired in all LS mutant  
104 cell lines. MT-ATP6/PDH showed a decrease in NPC and cortical plate markers at day 30, while  
105 DLD and PDH mutants showed a reduction of the upper layer markers SATB2, BRN2 and CUX1  
106 at day 100. These results point to aberrant corticogenesis as a driver of LS pathogenesis and  
107 demonstrate the utility of iPSC-derived systems to recapitulate CNS phenotypes and to test  
108 potential strategies to restore neurogenesis in LS.

109

## 110 **Results**

### 111 **Genomic characterization of Leigh syndrome fibroblasts.**

112 Due to the limited genomic information available for the three cell lines, we performed whole  
113 exome sequencing (WES) and mitochondrial sequencing of the fibroblasts prior to reprogramming  
114 (Figure 1A-C). Targeted analysis of the genes associated with Leigh syndrome (Lake et al., 2016)  
115 revealed a loss of function insertion/deletion (indel) frame shift in pyruvate dehydrogenase  
116 complex (PDHc) E1 alpha 1 subunit or pyruvate dehydrogenase (PDHA1, c.79delC, p.Arg27fs)  
117 in the cell lines GM03672 and GM13411. A single-nucleotide polymorphism (SNP) in the PDHc  
118 E3 subunit or dihydrolipoyl dehydrogenase (DLD, c.100A>G, p.Thr34Ala) was identified in  
119 GM01503 (Table S1). In addition to being part of the PDHc, DLD is also a component of the  $\alpha$ -  
120 ketoglutarate and branched chain  $\alpha$ -ketoacid dehydrogenase complexes (Craigien, 1996). Despite

121 the lack of genomic data, dysfunction of the PDH complex had been previously suggested in  
122 GM03672 and GM01503 (Hinman et al., 1989; Huh et al., 1990; Sorbi and Blass, 1982) as the  
123 main driver of the disease in these patients. To our knowledge, mutations in the nuclear genome  
124 of GM13411 have not been reported to date.

125 Mitochondrial sequencing identified several SNPs in all of the cell lines (Figure 1D). A loss of  
126 function SNP in the MT-ATP6 gene was identified in the GM13411 line. These mutations were  
127 reported in the original clinical case (Pastores et al., 1994). The authors described the T to G  
128 transition at the 8993 position that results in the substitution of a highly conserved leucine residue  
129 for an arginine (L156R). MT-ATP6 is part of the F0 domain of ATP synthase that functions as a  
130 proton channel. The L156R substitution prevents the induction of c-ring rotation, resulting in  
131 decreased ATP synthesis (Uittenbogaard et al., 2018). Heteroplasmic analysis of fibroblasts  
132 showed a 92% frequency of this mutation in the cell population, which is consistent with previous  
133 reports (Galera-Monge et al., 2016; Iyer et al., 2012; Pastores et al., 1994).

134

### 135 **Characterization of iPSCs derived from commercially available Leigh syndrome** 136 **fibroblasts.**

137 Metabolic remodeling is a crucial step toward reprogramming of somatic cells into iPSCs  
138 (Mathieu and Ruohola-Baker, 2017; Panopoulos et al., 2012; Rasmussen and Gama, 2020;  
139 Rastogi et al., 2019; Wu et al., 2016). Reprogramming of fibroblasts was performed as previously  
140 described (Takahashi et al., 2007) (Figure S1A); we generated iPSCs from a healthy age-  
141 matched control and the three LS cell lines. Pluripotency was evaluated using the microarray  
142 based analysis PluriTest (Müller et al., 2011). All three LS cell lines showed a high pluripotency  
143 score and a low novelty score (Figure S1B-C), congruent with the transcriptional profile of  
144 pluripotent stem cells. Moreover, all the reprogrammed cells expressed the pluripotent markers  
145 *NANOG* and *OCT4* (Figure S1D) and had a normal karyotype (Figure S1E)

146 To assess the ability of the LS and control cell lines to differentiate into the three germ layers,  
147 we performed trilineage differentiation. Commitment into ectodermal fate was evaluated by  
148 immunofluorescence staining of the marker PAX6 (Figure 2A), as well as the mRNA expression  
149 of the genes *GATA3* and *PAX6* (Figure 2B). The endoderm lineage was assessed by protein  
150 expression of the marker SOX17 (Figure 2C) and by qPCR with the expression of the genes  
151 *CDX2* and *SOX17* (Figure 2D). The PDH mutant cell line showed increased expression of the  
152 endodermal gene SOX17 (Figure 2D) compared to control and the other LS cell lines. Clinical  
153 data available from the patient with the PDH mutation showed elevated blood pyruvate levels.  
154 High concentrations of pyruvate have been shown to potentiate the differentiation of human  
155 embryonic stem cells (hESCs) into endodermal and mesodermal lineages while suppressing the  
156 expression of ectodermal markers in a lineage specific fashion (Song et al., 2019). Finally,  
157 mesodermal lineage was confirmed by the staining of the protein markers Brachyury and CXCR4  
158 (Figure 2E) and the expression of the genes *TBXT* and *NCAM* (Figure 2F).

159

160 **Two-dimensional neural differentiation is not affected by Leigh syndrome associated**  
161 **mutations.**

162 To determine if the LS mutations impact the commitment and development of the neural  
163 lineage, neural progenitor cells (NPCs) were generated by a dual SMAD inhibition protocol  
164 (Chambers et al., 2009) (Figure 3A). NPCs showed expected expression of the neural markers  
165 PAX6, NESTIN, and SOX2 (Figure 3B), with no differences between the protein expression of the  
166 LS cell lines and control (Figure S2A). The multipotent capacity of NPCs to generate the three  
167 basic neural lineages (neurons, astrocytes, and oligodendrocytes) was evaluated using standard  
168 protocols (Chambers et al., 2009; TCW et al., 2017; Vescovi and Snyder, 1999). Immunostaining  
169 showed  $\beta 3$  TUBULIN-positive neurons, OLIG2-positive oligodendrocytes and S100 $\beta$ -positive  
170 astrocytes (Figure 3C). Thus, LS NPCs constitute a multipotent population capable of  
171 differentiation into the main cellular populations of the nervous system.

172           Considering that neural cell death is a hallmark of LS, we performed a cell viability assay to  
173 investigate the sensitivity of the LS derived NPCs to different apoptotic stimuli (Figure S2B).  
174 Treatment with DNA damaging agents etoposide and neocarzinostatin, as well as the microtubule  
175 depolymerizing agent nocodazole, did not show increased sensitivity to cell death in LS NPCs  
176 compared to control. To evaluate the susceptibility of the NPCs to mitochondrial damage, we  
177 treated these cells with the mitochondrial oxidative phosphorylation uncoupler, CCCP. No  
178 difference was observed in the viability of the LS NPCs compared to control treated with this  
179 mitochondrial toxicant.

180           Mitochondria in murine NPCs form an elongated network (Khacho et al., 2016) which  
181 fragments as cells differentiate. Characterization of the mitochondrial network using structured  
182 illumination microscopy (SIM) showed no major morphological changes in LS NPCs (Figure 3D).  
183 Thus, LS mutations do not affect the capacity of the NPCs to further differentiate into the three  
184 neural lineages, do not affect the viability of the NPCs when exposed to different exogenous  
185 stressors in a monolayer culture, and do not perturb the morphology of the mitochondrial network  
186 in these cells.

187

### 188 **LS mutations cause differential accumulation of metabolites in neuralized embryoid** 189 **bodies.**

190           Previous studies using cells from LS patients carrying homozygous *SURF1* (c.769G>A and  
191 c.530T>G) (Inak et al., 2019) and MT-ATP6 (m.9185T>C) (Lorenz et al., 2017) mutations showed  
192 abnormal generation of neural lineages *in vitro* using two-dimensional culture systems. *SURF1*  
193 mutations caused impaired neurogenesis in cerebral organoids (Inak et al., 2019). Therefore, we  
194 investigated the effects of the PDH, DLD, and MT-ATP6/PDH LS mutations on neurogenesis  
195 using three-dimensional (3D) models of neural development as described previously (Lancaster  
196 and Knoblich, 2014; Romero-Morales et al., 2019). Most of these 3D neural systems start with  
197 the formation of neuralized embryoid bodies (EBs). EBs are generated from a single cell

198 suspension (Itskovitz-Eldor et al., 2000) plated in ultra-low attachment microwells with neural  
199 induction media (Figure 4A). EB diameter was measured at day 5 before plating on Matrigel  
200 coated imaging plates. All three LS mutant lines showed an increase in their diameter compared  
201 to control (Figure 4B, PDH vs Control & DLD vs Control:  $p < 0.0001$ , MT-ATP6/PDH vs Control:  
202  $p = 0.0209$ ).

203 We then measured metabolite levels in EBs derived from LS cell lines using LC-MS-based  
204 metabolomics (Table S2). Several pathways were found to be potentially altered in the LS EBs  
205 compared to controls (Figure 4C and Table S3). These include central carbon metabolism (for  
206 example glycolytic intermediates like Fructose 2,6-bisphosphate (f2,6p) and tricarboxylic acid  
207 cycle (TCA) intermediates like citrate seem to be consistently enriched), glutathione metabolism,  
208 serine metabolism, cysteine metabolism, and nucleotide metabolism. Dihydroorotate, lactate, and  
209 aspartate are metabolites that were altered in the setting of electron transport chain (ETC)  
210 inhibition, and there is evidence of a trend towards enrichment of dihydroorotate, lactate, and  
211 aspartate compared to control. There also appears to be an enrichment of the NAD pool. These  
212 results suggest that LS mutations result in differential changes in metabolite concentrations, which  
213 may cause downstream changes in gene expression or cellular function.

214

### 215 **Neural rosettes derived from Leigh syndrome iPSCs show morphological differences.**

216 To investigate the effects of LS associated mutations in early stages of CNS development,  
217 we generated neural rosettes using EBs grown in the presence of SMAD inhibitor media (Figure  
218 5A) (Elkabetz et al., 2008; Zhang et al., 2001). These structures have previously been established  
219 to recapitulate the early neural tube formation stage of development (Elkabetz et al., 2008; Wilson  
220 and Stice, 2006).

221 Neural rosettes were stained with the tight junction marker ZO-1 (Elkabetz et al., 2008;  
222 Hříbková et al., 2018) and the centrosomal marker CDK5RAP2 (Figure 5B). Quantification of the  
223 number of neural rosettes per field of view showed a reduction in the counts of these structures



224 in the DLD mutant compared to controls (Figure 5C,  $p < 0.001$ ). Lumen area quantification showed  
225 an increase in the PDH and MT-ATP6/PDH mutants, while the DLD mutant line showed a  
226 decrease in their area relative to controls (Figure 5D). The neural rosettes obtained from all cell  
227 lines followed the expected formation sequence described previously (Hřibková et al., 2018). The  
228 polymerization of  $\alpha$ -tubulin and the generation of the ZO-1 ring at the apical region of the rosettes  
229 are conserved in the LS mutants. Increased neural rosette lumen size has previously been  
230 associated with TGF $\beta$  pathway activation (Medelnic et al., 2018), Notch and SHH pathway  
231 activation, and WNT inhibition (Elkabetz et al., 2008). Large rosette formation has been previously  
232 shown to be a consequence of apical domain opening and expansion rather than a process  
233 dependent on cell proliferation (Medelnic et al., 2018).

234

### 235 **Leigh syndrome associated mutations disrupt corticogenesis in cerebral organoids.**

236 To investigate the effects of these mutations during corticogenesis, we generated cerebral  
237 organoids from LS iPSCs (Figure 6A). Differences between the cell lines became apparent as  
238 early as the neuroepithelial bud expansion phase. After Matrigel embedding, the MT-ATP6/PDH  
239 mutant cell line showed poor budding with large areas of non-neuroepithelial cells (Figure S3A).  
240 Defective organoid formation in this cell line was significantly higher than control and the other  
241 two LS cell lines (Figure S3B). A previous report showed that when iPSCs generated from  
242 fibroblasts harboring the same T8993G mitochondrial mutation were differentiated into EBs, there  
243 was rapid regression and death after 7 days in suspension, while the monolayer culture did not  
244 show obvious deficits in cell growth (Grace et al., 2019). Given the fact the neuroectoderm  
245 expansion phase happens during days 7-10, the degeneration of the MT-ATP6/PDH organoids  
246 after embedding may recapitulate these previously reported observations.

247 Higher metabolic requirements have been shown to be associated with NPC proliferation and  
248 migration in three-dimensional scaffolds and development (Fang et al., 2020; Homem et al.,  
249 2015). As the PDH mutant line did not show this particular phenotype during the expansion of the

250 neural epithelium, the presence of the additional mitochondrial mutation in the MT-ATP6/PDH line  
251 and the metabolic burden generated by the double mutation may be the reason for reduction of  
252 organoid formation efficiency.

253 Cerebral organoid growth was tracked for 100 days (Figure 6B). Growth differences in the  
254 average diameter of the organoids become significant at day 80 between control and the PDH  
255 mutant line. At days 90 and 100, organoids derived from all LS cell lines were significantly smaller  
256 than the controls. Phenotypic information available for the patient from which the PDH mutant cell  
257 line was derived indicate that this particular patient presented with microcephaly. Hence, we were  
258 able to mimic an aspect of the patient phenotype *in vitro* using the cerebral organoid model  
259 system.

260 In order to assess the effect of the LS mutations during the first stages of corticogenesis, day  
261 30 organoids were sectioned and stained for ventricular zone (VZ), subventricular zone (sVZ),  
262 and cortical plate (CP) markers (Figure 6C). As expected, based on the defective neuroepithelial  
263 expansion, MT-ATP6/PDH organoids showed a significant reduction in the number of cells that  
264 stained positive for the NPC markers PAX6 and NESTIN, as well as the outer radial glia marker  
265 TBR2 (Figure 6D). In addition to these findings, the overall architecture in MT-ATP6/PDH  
266 organoids was compromised. There were few to no ventricle-like structures present and the foci  
267 of PAX6+ cells were not organized in the expected radial pattern.

268 Migration of early born neurons *in vivo* depends on pioneer Cajal-Retzius neurons that are  
269 positive for the glycoprotein REELIN (Lancaster et al., 2017). Cells positive for this marker were  
270 identified in superficial regions of control, PDH, and DLD organoids, while none were observed in  
271 the MT-ATP6/PDH organoids (Figure 6E). Early born neurons at this time point are expected to  
272 migrate into the CP that will later give rise to the deep cortical layers (Camp et al., 2015). CTIP2+  
273 and TBR1+ cells were observed in control, PDH, and DLD organoids but absent in MT-ATP6/PDH  
274 organoids, demonstrating once again a profound impairment in the early stages of corticogenesis  
275 when both MT-ATP6 and PDH mutations are present.

276 Mitochondrial morphology was evaluated in the VZ NPCs of the cerebral organoids. Cells  
277 positive for NPC marker SOX2+ demonstrated elongated mitochondrial networks that extend  
278 radially from the ventricle-like lumen (Figure 6F). This observation is consistent with what has  
279 been previously reported in SOX2+ cells in the developing mouse cortex (Khacho et al., 2016).  
280 DLD mutant organoid NPCs showed a fragmented mitochondrial network in comparison with  
281 control and PDH. As mentioned earlier, the stereotypical arrangement of the VZ was  
282 compromised in most MT-ATP6/PDH organoids. In the few areas where ventricle-like structures  
283 were identified with a conserved SOX2+ VZ, the mitochondrial network seemed more fragmented  
284 and aggregated. This morphology was also observed in the clusters of SOX2+ cells that were  
285 scattered throughout the organoid.

286 In order to assess the proper cortical layer fate specification during normal cortical  
287 development, we grew the cerebral organoids until day 100 and probed for upper cortical layer  
288 markers (Figure 7A) (Florio and Huttner, 2014; Lui et al., 2011; Saito et al., 2011). Late born  
289 superficial layer markers CUX1, BRN2, and SATB2 (layers II, III and IV, respectively) were  
290 reduced in PDH and DLD organoids and were absent in MT-ATP6/PDH organoids (Figure 7B-D).  
291 CTIP2+ cells were also reduced in PDH and DLD organoids (Figure 7B-C). Interestingly, at day  
292 100, few PAX6+ cells were observed in PDH and DLD organoids, whereas in MT-ATP6/PDH  
293 organoids they were present. The reduction in the number and variety of cell types found in PDH  
294 and DLD may explain the decrease in the diameter of the organoids derived from these cell lines  
295 (Figure 6B).

296 Compared to controls, LS cerebral organoids showed increased staining for the astrocyte  
297 marker S100 $\beta$  at day 100 (Figure 7C). The decrease in the diversity of neuronal cell types and  
298 the increase in the presence of S100 $\beta$ + cells may suggest a switch to astrocyte fate during cortical  
299 development in LS. Clinical data from LS patients include a marked gliosis as part of the  
300 characteristic findings (Lake et al., 2015). While this marked gliosis is potentially associated with  
301 a reactive process secondary to neuronal damage, an intriguing alternate possibility is that

302 progenitor cells may have an increased propensity to differentiate down the astrocyte lineage due  
303 to LS-causative mutations. Previous studies have shown that reactive astrocytes acquire  
304 molecular hallmarks of radial glial cells. It was also shown through genetic fate mapping mature  
305 astroglial cells can dedifferentiate and resume proliferation (Robel et al., 2009, 2011). Thus, the  
306 phenotypes uncovered here could either reflect that chronic metabolic stress induced by Leigh  
307 syndrome mutations activates a brain injury response, or that the inhibition of mitochondrial  
308 metabolism in neural progenitor cells could cause defects in lineage selection.

309 We then explored the changes in metabolites in Day 40 organoids from control and LS  
310 samples (Figure S4). From the top 10 metabolites identified, the organic osmolyte betaine was  
311 increase in the control compared to the DLD and PDH samples and the quaternary amine  
312 carnitine was increased in the control compared with all LS samples. L-Carnitine is essential for  
313 the transport of long chain fatty acids into mitochondria for degradation by  $\beta$ -oxidation (Jernberg  
314 et al., 2017). Carnitine concentration in the brain increases during gestation (Nakano et al., 1989)  
315 and has been reported as a therapeutic option for children affected by metabolic diseases.  
316 Moreover, this compound has been shown to decrease oxidative stress, improve the brain energy  
317 status, and prevent neuronal cell death in animal models of brain injury and ischemia (Ferreira  
318 and McKenna, 2017).

319 Pseudouridine, an isomer of uridine and the most abundant RNA modification, was  
320 decreased in DLD organoids. Pseudouridine and pseudouridine synthases (Pus) have been  
321 associated with regulating neuronal functions (Angelova et al., 2018). Specifically, Pus3 has been  
322 implicated in neural development (Diez-Roux et al., 2011). A truncated form of Pus3 accompanied  
323 with reduced levels of pseudouridine in tRNA has been identified in patients with intellectual  
324 disabilities (Shaheen et al., 2016).

325 High lactate was identified in both PDH and MT-ATP6/PDH organoids, correlating with the  
326 available clinical information that both patients presented elevated lactic acid in blood (Table 1).  
327 Lactic acid accumulation in blood and cerebrospinal fluid is the key clinical indicator for LS

328 diagnosis and is particularly expected in the setting of PDH dysfunction (Miyabayashi et al., 1985).  
329 Also, in these two lines the metabolite proline was elevated. High levels of proline have been  
330 associated with negative effects in brain function by interference in glutamatergic  
331 neurotransmission (Gogos et al., 1999; Vorstman et al., 2009). In addition, hydroxyphenyllactic  
332 acid was elevated in PDH mutant organoids. High levels of this metabolite have been reported in  
333 association with high lactate and pyruvate in pediatric lactic acidosis in patients with PDHc  
334 deficiency (Stern, 1994). Not surprisingly, in the MT-ATP6/PDH mutant organoids, pyruvate was  
335 also increased, correlating with the lactic acidosis expected in the organoids based on the patient  
336 phenotypes and the presence of the PDH mutation that hinders flux from pyruvate into the TCA  
337 cycle through acetyl-CoA.

338 Besides the previously mentioned metabolites, MT-ATP6/PDH mutant organoids presented  
339 increased levels of choline, cytidine, and leucine. Choline is a crucial metabolite for normal CNS  
340 development. Neural tube defects have been associated with lack of choline during early  
341 pregnancy (Zeisel, 2006). It has also been shown to increase cell proliferation and decrease  
342 apoptosis in fetal rat hippocampal progenitor cells (Albright et al., 1999b, 1999a; Zeisel and  
343 Niculescu, 2006). Choline is also crucial for the production of the neurotransmitter acetylcholine,  
344 the sphingolipid sphingomyelin, and myelin (Oshida et al., 2003). Concomitantly, cytidine is used  
345 with choline for the generation of cytidine-5-diphosphocholine, a crucial intermediate in the  
346 biosynthesis of the cell membrane phospholipids phosphatidylcholine and  
347 phosphatidylethanolamine (Cansev, 2006; Rema et al., 2008). Increased abundance of the  
348 branched chain amino acid leucine has been associated with the metabolic illness maple syrup  
349 urine disease and can be extremely neurotoxic (Bridi et al., 2005; García-Cazorla et al., 2014).  
350 This amino acid is considered ketogenic as its end products can enter the TCA cycle for energy  
351 generation or act as precursors for lipogenesis and ketone body production (Manoli and Venditti,  
352 2016).

353           Considering all the aforementioned findings, the cerebral organoid system emerges as a  
354 promising model for the study of the effects of LS associated mutations in brain development and  
355 the effects of metabolic impairment during corticogenesis.

356

## 357 **Discussion**

358           Inborn errors of metabolism are rare genetic disorders resulting from defects in metabolic  
359 pathways (Agana et al., 2018; Das et al., 2010). Mitochondrial diseases are the most common  
360 group of inherited metabolic disorders and are among the most common forms of inherited  
361 neurological disorders (Gorman et al., 2016). These illnesses are challenging not only at the time  
362 of diagnosis but also during their medical evolution, as they involve multiple organ systems and  
363 there are limited therapeutic options (Grier et al., 2018; Parikh et al., 2017; Schaefer et al., 2019).

364           Leigh syndrome is one of these rare inherited neurometabolic diseases, with more than 75  
365 causal genes identified in both nuclear and mitochondrial DNA. It has an early onset, affecting  
366 most patients within their first year of life, although cases during teenage years and adulthood  
367 have been reported (Finsterer, 2008; Lake et al., 2016). As it is a highly heterogenous disease,  
368 the establishment of animal and *in vitro* models has been challenging and limited to only select  
369 mutations. The few animal models available have been utilized for the development of therapeutic  
370 approaches with mixed results. Gene editing using adeno-associated virus in *Ndufs4*<sup>-/-</sup> mice has  
371 shown partial rescue of the phenotype (Di Meo et al., 2017). Supplementation of nicotinamide  
372 riboside to *Sco2*<sup>-/-</sup> mice showed improvement of the respiratory chain defect and increased  
373 exercise tolerance due to improved mitochondrial biogenesis (Cerutti et al., 2014). Hypoxia and  
374 low oxygen availability in the brain have also been shown to increase the life span and improve  
375 neurological findings in *Ndufs4*<sup>-/-</sup> mice (Ferrari et al., 2017; Jain et al., 2016, 2019).

376           Molecular testing and prenatal diagnosis of respiratory chain disorders using skin fibroblasts  
377 and muscle biopsies for diagnostic and research purposes are becoming mainstream procedures  
378 (Baertling et al., 2014; Calvo et al., 2006, 2012; Schubert and Vilarinho, 2020). Nevertheless,

379 heteroplasmy in mitochondrial DNA among tissues can cause less pronounced or absent  
380 phenotypes in cultured cells (Baertling et al., 2014). Here we report the characterization and the  
381 subsequent generation of brain organoids from three commercially available Leigh syndrome  
382 fibroblast cell lines and an age matched control.

383 Three dimensional differentiation generates higher numbers of NPCs and more mature  
384 neurons than two dimensional differentiation (Chandrasekaran et al., 2017; Di Lullo and  
385 Kriegstein, 2017; Muratore et al., 2014; Paşca et al., 2015) in part due to an improved spatial  
386 cellular environment that influences cell fate specification. Tissue architecture, mechanical cues,  
387 cell-to-cell communication (Pampaloni et al., 2007), nutrient accessibility, oxygen tension, as well  
388 as morphogen gradients characteristic of 3D systems (Tibbitt and Anseth, 2012) aid to  
389 recapitulate the development of the central nervous system (CNS) up to approximately 16 weeks  
390 post-fertilization (Camp et al., 2015; Paşca et al., 2015). We observed that all the LS cerebral  
391 organoids failed to thrive at different time points. Although organoid development initially  
392 appeared normal in cell lines with nuclear encoded LS mutations, at later time points, the overall  
393 diameter decreased, presumably due to failure to generate upper layer neurons. This reduction  
394 of late born neurons may be due to the overall reduction in the PAX6+ NPCs in both PDH and  
395 DLD compared to controls. Interestingly, PDH cerebral organoids displayed arrested growth very  
396 early on, correlating with the microcephaly observed in the source patient.

397 The increase in the glial-specific marker S100 $\beta$  in DLD and MT-ATP6/PDH organoids could  
398 also correlate with the observation that gliosis is a common clinical finding in LS patients (Baertling  
399 et al., 2014, 2016; Schubert and Vilarinho, 2020). The formation of lesions in LS has been  
400 described as the result of OXPHOS dysfunction and subsequent ATP depletion. Neuronal  
401 dysfunction is suspected to trigger chronic gliosis (Baertling et al., 2016). In patients, the gliosis  
402 phenotype can be accompanied by vascular hypertrophy and production of excess ROS, which  
403 increases neuronal damage (Lake et al., 2015). However, due to the lack of vascularization in the

404 organoid model, replicating the vascular abnormalities associated with LS is not feasible in this  
405 system.

406 The profound dysregulation of corticogenesis in the double mutant MT-ATP6/PDH, may  
407 suggest that some pregnancies harboring LS-causing mutations may not be viable, which could  
408 lead to an underestimation of the prevalence of the disease in the population (Feeney et al.,  
409 2019). Prenatal genetic evaluation is now being performed for cases where there is a known risk  
410 for mitochondrial mutations (Craven et al., 2017; White et al., 1999). This testing can be performed  
411 as early as 10-12 weeks post conception and is usually requested if there is a history of a  
412 previously affected child or first degree relative (Nesbitt et al., 2014). Interpretation of these tests  
413 is challenging in the case of mitochondrial mutations due to heteroplasmy; the biopsied tissues  
414 may exhibit a different mutational burden compared with other fetal tissues (Ferlin et al., 1997;  
415 Harding et al., 1992; Nesbitt et al., 2014; Steffann et al., 2007).

416 In a previous study (Hattori et al., 2016), the metabolic signature analysis of iPSCs derived  
417 from a mitochondrial encoded LS mutation (m.10191T>C) showed differences in the abundance  
418 of pyruvate and lactate, among others. Interestingly, the metabolic difference between control and  
419 LS cells was reported to revert back to normal after EB differentiation (Hattori et al., 2016). In our  
420 study, metabolomic analysis from neuralized EBs and organoids show that the observed changes  
421 in the metabolites are in line with the clinical observations of LS patients. Changes in blood and  
422 cerebral spinal fluid concentration of lactate and pyruvate are common diagnostic tools for LS  
423 (Hattori et al., 2016) and other mitochondrial diseases (Barshop, 2004; Buzkova et al., 2018;  
424 Esterhuizen et al., 2017; Rahman and Rahman, 2018). We also identified trends toward changes  
425 in other metabolites, like dihydroorotate and aspartate, that highlight the overall impact of LS  
426 mutations at different steps of the metabolic pathway (ETC complex III, TCA cycle and *de novo*  
427 nucleotide synthesis, and NADH/NAD<sup>+</sup> ratio).

428 The metabolic dysregulation of the affected tissues in LS may have a direct effect on mitochondrial  
429 morphology and function. Mitochondrial fragmentation is a hallmark of glycolytic cell types such



430 as stem cells and cancer cells (Chen and Chan, 2017; Rastogi et al., 2019). Moreover,  
431 neurogenesis defects have been observed in the context of mitochondrial morphology  
432 dysregulation and are considered to be upstream regulators of self-renewal and cell fate decisions  
433 in stem cells (Khacho et al., 2016). In addition, energetic requirements have been shown to  
434 directly impact the capacity of progenitor cells to migrate and thrive in 3D environments (Zanotelli  
435 et al., 2018, 2019). Hence, mitochondrial morphology disruption observed in the double mutant  
436 MT-ATP6/PDH organoids is expected when analyzed in conjunction with the metabolic and  
437 developmental profile of these mutant organoids. To our knowledge, this is the first time that  
438 mitochondrial morphology in the cortex has been analyzed in a human model system of LS brain  
439 development and highlights the potential importance of mitochondria network plasticity for the  
440 proper specification of cell fate and survival.

441 Here, we presented the characterization of three commercially available LS cell lines from  
442 fibroblasts to cerebral organoids. We were able to identify new genetic alterations in these  
443 samples by using whole exome sequencing and mitochondrial DNA sequencing. We described  
444 the effects of these mutations in a 3D cerebral organoid system. We aim to provide a  
445 comprehensive phenotypic characterization of available patient samples to encourage their  
446 utilization as model systems for uncovering the mechanisms underlying neuronal cell death in the  
447 context of LS and for drug discovery.

448

449

450

451 **Figure Legends**

452 **Figure 1.** Whole exome sequencing identifies novel mutations in Leigh syndrome fibroblasts. A.  
453 Schematic of the WES and mitochondrial sequencing workflow. B. Representation of whole  
454 genome sequencing data, highlighting the top 20 genes containing high impact indels. C.  
455 Representation of whole genome sequencing data, highlighting the top 20 genes containing high  
456 impact SNPs (increased likelihood of disrupting protein function). D. Mitochondrial sequencing  
457 identifies novel mutations in LS fibroblasts. Representation of mitochondrial sequencing data,  
458 highlighting mitochondrial genes containing mutations (transitions, deletions, or transversions).  
459 Red dots: represent DLD line. Green dots: represent the PDH line. Orange dots: represent the  
460 MT-ATP6/PDH line.

461  
462 **Figure 2.** Induced pluripotent stem cells derived from Leigh syndrome patient fibroblasts are  
463 capable of differentiation into specific lineages. A-B. Representative images of the ectoderm  
464 marker Pax6 (A) and qPCR for the ectodermal genes *GATA3* and *PAX6* (B). C-D. Representative  
465 images of the endoderm marker SOX17 (C) and qPCR for the ectodermal genes *CDX2* and  
466 *SOX17* (D). E-F. Representative images of the mesoderm markers Brachyury and CXCR4 (E)  
467 and qPCR for the mesodermal genes *TBXT* and *NCAM* (F). Scale bar: 100µm.

468  
469 **Figure 3.** Leigh syndrome derived NPCs are multipotent and do not show aberrant mitochondrial  
470 morphology compared to control. A. Schematic of two-dimensional neural differentiation. B.  
471 Immunoblot of protein expression of neural markers Pax6, Nestin, and Sox2. Scale bar: 100µm  
472 C. Immunofluorescence for multipotency markers. Neural progenitor cells stained by Pax6 and  
473 Nestin, neurons marked with  $\beta$ III-tubulin, oligodendrocytes stained with Olig2 and astrocytes are  
474 marked with S100 $\beta$ . D. Representative super-resolution images of mitochondrial morphology  
475 (Mitotracker) in LS and control NPCs. Scale bar: 5µm.

476 **Figure 4.** Generation of neuralized EBs from Leigh syndrome derived iPSCs lead to changes in  
477 EB diameter and the abundance of metabolites involved in central carbon metabolism. A.  
478 Schematic of EB generation protocol. B. Embryoid body diameter is increased in the three LS cell  
479 lines. C. Metabolite abundance pathway analysis. Top metabolic pathways affected in day 10 LS  
480 neuralized EBs. Statistical p values from enrichment analysis are adjusted for multiple testing.  
481 Total: number of total compounds in the pathway. Hits: matched number from the uploaded data.  
482 Raw p: original p value calculated from the enrichment analysis. Holm p: p value adjusted by  
483 Holm-Bonferroni method. FDR p: adjusted p value using False Discovery Rate. Impact: pathway  
484 impact value calculated from pathway topology analysis. \*p < 0.05; \*\*p < 0.001, \*\*\*p < 0.0001.

485  
486 **Figure 5.** Three-dimensional differentiation reveals abnormalities during induction of neural  
487 rosettes in LS cell lines. A. Schematic of neural rosette generation protocol. B-D. Representative  
488 confocal images of neural rosettes (C) show decreased numbers of neural rosettes per field in  
489 the DLD mutant line (D). Quantification of the lumen area ( $\mu\text{m}^2$ ) indicate increased lumen area in  
490 the PDH and MT-ATP6/PDH mutant cell lines and a decreased lumen area in the DLD mutant  
491 line. Scale bar: 50 $\mu\text{m}$ . \*p < 0.05; \*\*p < 0.001, \*\*\*p < 0.0001.

492  
493 **Figure 6.** Leigh syndrome derived brain organoids show a reduction in size and MT-ATP6/PDH  
494 mutant brain organoids show defects in SVZ/VZ and CP formation and aberrant mitochondrial  
495 morphology in Sox2+ cells. A. Schematic of brain organoid generation protocol. B. Brain organoid  
496 growth curves. LS derived brain organoids show reduction in size when grown for 100 days. C.  
497 Schematic representation of the expected organization of the brain organoids at day 30. D-E.  
498 Representative immunostaining confocal images of day 30 brain organoids. MT-ATP6/PDH  
499 mutant present a severe disorganization of the SVZ/VZ markers Pax6 and Tbr2, as well as the  
500 neural progenitor marker Nestin (D). MT-ATP6/PDH mutant do not express the CP and deep layer  
501 markers CTIP2 and TBR1 (E). Scale bar: 100 $\mu\text{m}$ . F. Representative confocal images of day 30

502 brain organoids showing mitochondrial morphology (Tomm20). The red line divides the Sox2+  
503 neural progenitor cells surrounding the lumen (L) from newly committed neurons. MT-ATP6/PDH  
504 mutant organoids show disorganization and fragmentation of the mitochondrial network compared  
505 to control. Scale bar: 10 $\mu$ m. SVZ: subventricular zone, VZ: ventricular zone, CP: cortical plate,  
506 MZ: marginal zone. \*  $p < 0.05$  for Control and PDH mutant; †  $p < 0.05$  for Control and DLD mutant,  
507  $\phi$   $p <$  for Control and MT-ATP6/PDH mutant.

508

509 **Figure 7.** Leigh syndrome derived brain organoids show defects in cortical layer formation at day  
510 100. A. Schematic representation of the expected organization of the brain organoids at day 100.  
511 B-D. Representative immunostaining confocal images of day 100 brain organoids. LS derived  
512 brain organoids present reduced expression of the upper layer markers SATB2 (B), BRN2 (C)  
513 and CUX1 (D) and deep layer marker CTIP2 (C & D). Increased expression of the astrocyte  
514 marker S100 $\beta$  was also noticed in the MT-ATP6/PDH mutant line. Scale bar: 100 $\mu$ m. SVZ:  
515 subventricular zone, VZ: ventricular zone, DL: deep layers UL: upper layers, MZ: marginal zone.

516

517

518 **STAR Methods**

519 **Key Resource Table**

| <b>REAGENT or RESOURCE</b>                        | <b>SOURCE</b>             | <b>IDENTIFIER</b>          |
|---------------------------------------------------|---------------------------|----------------------------|
| <b>ANTIBODIES</b>                                 |                           |                            |
| <b>Primary Antibodies (Immunocytochemistry)</b>   |                           |                            |
| Rabbit anti-PAX6                                  | Cell Signaling Technology | Cat # 60433, AB_2797599    |
| Rabbit anti-SOX17                                 | Cell Signaling Technology | Cat # 81778S, AB_2650582   |
| Rabbit anti-BRACHYURY                             | Cell Signaling Technology | Cat # 81694S, AB_2799983   |
| Mouse anti-CD184 (CXCR4)                          | STEMCELL Technologies     | Cat # 60089                |
| Mouse anti- $\beta$ 3 tubulin                     | Cell Signaling Technology | Cat # 4466, AB_10270973    |
| Rabbit anti-S100                                  | Abcam                     | Cat # ab868, AB_306716     |
| Mouse anti-Olig2                                  | Millipore Sigma           | Cat # MABN50, AB_10807410  |
| Rat anti- $\alpha$ tubulin                        | Thermo Fisher Scientific  | Cat # MA180017, AB_2210201 |
| Mouse anti-ZO-1                                   | Thermo Fisher Scientific  | Cat # 339100, AB_2533147   |
| Rabbit anti-CDK5RAP2                              | Bethyl Laboratories       | Cat # IHC00063, AB_2076863 |
| Mouse anti-Nestin                                 | STEMCELL Technologies     | Cat # 60091, AB_2650581    |
| Chicken anti-TBR2                                 | Millipore Sigma           | Cat # AB15894, AB_10615604 |
| Mouse anti-Reelin                                 | Millipore Sigma           | Cat # MAB5366, AB_2285132  |
| Rat anti-CTIP2                                    | Abcam                     | Cat # ab18465, AB_2064130  |
| Rabbit anti-TBR1                                  | Abcam                     | Cat # ab31940, AB_2200219  |
| Rabbit anti-TOM20                                 | Cell Signaling Technology | Cat # 42406, AB_2687663    |
| Mouse anti-SATB2                                  | Abcam                     | Cat # ab51502, AB_882455   |
| Mouse anti-BRN2 (POU3F2)                          | Millipore Sigma           | Cat # MABD51, AB_11204531  |
| Mouse anti-CASP (CUX1)                            | Abcam                     | Cat # ab54583, AB_941209   |
| <b>Secondary Antibodies (Immunocytochemistry)</b> |                           |                            |
| Goat anti Chicken Alexa Fluor 647                 | Thermo Fisher Scientific  | Cat # A-21449, AB_2535866  |
| Goat anti Rat Alexa Fluor 647                     | Thermo Fisher Scientific  | Cat # A-21247, AB_2535864  |
| Donkey anti Rabbit Alexa Fluor 647                | Thermo Fisher Scientific  | Cat # A-31573, AB_2536183  |
| Donkey anti Mouse Alexa Fluor 647                 | Thermo Fisher Scientific  | Cat # A-31571, AB_162542   |
| Donkey anti Rabbit Alexa Fluor 546                | Thermo Fisher Scientific  | Cat # A-10040, AB_2534016  |

|                                                                |                            |                                |
|----------------------------------------------------------------|----------------------------|--------------------------------|
| Donkey anti Mouse Alexa Fluor 546                              | Thermo Fisher Scientific   | Cat # A-10036, AB_2534012      |
| Donkey anti Rabbit Alexa Fluor 488                             | Thermo Fisher Scientific   | Cat # A-21206, AB_2535792      |
| Donkey anti Mouse Alexa Fluor 488                              | Thermo Fisher Scientific   | Cat # A-21202, AB_141607       |
| <b>Primary Antibodies (Western Blotting)</b>                   |                            |                                |
| Rabbit anti-PAX6                                               | Cell Signaling Technology  | Cat # 60433, AB_2797599        |
| Mouse anti-Nestin                                              | STEMCELL Technologies      | Cat # 60091, AB_2650581        |
| Rabbit anti-Sox2                                               | Cell Signaling Technology  | Cat # 3579, AB_2195767         |
| Mouse anti- $\alpha$ tubulin                                   | Sigma-Aldrich              | Cat # T9026, AB_477593         |
| <b>Secondary Antibodies -HRP conjugated (Western Blotting)</b> |                            |                                |
| Peroxidase AffiniPure Donkey Anti-Rabbit IgG (H+L)             | Jackson ImmunoResearch Inc | Cat # 711-035-152, AB_10015282 |
| Peroxidase AffiniPure Donkey Anti-Mouse IgG (H+L)              | Jackson ImmunoResearch Inc | Cat # 715-035-151, AB_2340771  |
| <b>CHEMICALS, PEPTIDE, AND RECOMBINANT PROTEINS</b>            |                            |                                |
| Y-27632 Rho/Rock pathway inhibitor                             | STEMCELL Technologies      | Cat # 72307                    |
| Dorsomorphin                                                   | Millipore Sigma            | Cat # P5499                    |
| SB431542                                                       | REPROCELL                  | Cat # 04-0010-10               |
| Etoposide                                                      | Millipore Sigma            | Cat # E1383                    |
| Carbonyl cyanide 3-chlorophenylhydrazone (CCCP)                | Sigma Aldrich              | Cat # C2759                    |
| Nocodazole                                                     | Sigma Aldrich              | Cat # M1404                    |
| Neocarzinostatin                                               | Sigma Aldrich              | Cat # 9162                     |
| <b>CRITICAL COMMERCIAL ASSAYS AND KITS</b>                     |                            |                                |
| PluriTest Assay                                                | Thermo Fisher Scientific   | Cat# A38154                    |
| KaryoStat Assay                                                | Thermo Fisher Scientific   | Cat# A38153                    |
| Mitochondrial DNA sequencing                                   | Girihlet                   |                                |
| Whole Exome sequencing                                         | Genewiz LLC                |                                |
| CytoTune iPS 2.0 Sendai Reprogramming Kit                      | Thermo Fisher Scientific   | Cat # A16517                   |
| STEMdiff Trilineage Differentiation Kit                        | STEMCELL Technologies      | Cat# 05230                     |

|                                        |                                                           |                                                                                                                                                                                                                                                                  |
|----------------------------------------|-----------------------------------------------------------|------------------------------------------------------------------------------------------------------------------------------------------------------------------------------------------------------------------------------------------------------------------|
| NeuroCult™ media                       | STEMCELL Technologies                                     | Cat # 05752                                                                                                                                                                                                                                                      |
| Astrocyte medium                       | ScienCell                                                 | Cat # 1801                                                                                                                                                                                                                                                       |
| CellTiter Blue Viability Assay         | Promega                                                   | Cat # G8081                                                                                                                                                                                                                                                      |
| <b>DEPOSITED DATA</b>                  |                                                           |                                                                                                                                                                                                                                                                  |
| Raw and analyzed sequencing data       | Done by Creative Solutions (J.P.C, Vanderbilt University) | <a href="https://www.ncbi.nlm.nih.gov/sra/PRJNA626388">https://www.ncbi.nlm.nih.gov/sra/PRJNA626388</a><br><a href="https://vandydata.github.io/Romero-Morales-Gama-Leigh-Syndrome-WES/">https://vandydata.github.io/Romero-Morales-Gama-Leigh-Syndrome-WES/</a> |
| <b>EXPERIMENTAL MODELS: CELL LINES</b> |                                                           |                                                                                                                                                                                                                                                                  |
| AG16409 control fibroblasts            | Coriell Institute                                         | <a href="https://www.coriell.org/0/Sections/Search/Sample_Detail.aspx?Ref=AG16409&amp;Product=CC">https://www.coriell.org/0/Sections/Search/Sample_Detail.aspx?Ref=AG16409&amp;Product=CC</a>                                                                    |
| GM13411 (MT-ATP6/PDH) fibroblasts      | Coriell Institute                                         | <a href="https://www.coriell.org/0/Sections/Search/Sample_Detail.aspx?Ref=GM13411&amp;Product=CC">https://www.coriell.org/0/Sections/Search/Sample_Detail.aspx?Ref=GM13411&amp;Product=CC</a>                                                                    |
| GM03672 (PDH Mutant) fibroblasts       | Coriell Institute                                         | <a href="https://www.coriell.org/0/Sections/Search/Sample_Detail.aspx?Ref=GM03672&amp;Product=CC">https://www.coriell.org/0/Sections/Search/Sample_Detail.aspx?Ref=GM03672&amp;Product=CC</a>                                                                    |
| GM01503 (DLD Mutant) fibroblasts       | Coriell Institute                                         | <a href="https://www.coriell.org/0/Sections/Search/Sample_Detail.aspx?Ref=GM01503&amp;Product=CC">https://www.coriell.org/0/Sections/Search/Sample_Detail.aspx?Ref=GM01503&amp;Product=CC</a>                                                                    |
| <b>SEQUENCE-BASED REAGENTS</b>         |                                                           |                                                                                                                                                                                                                                                                  |
| <b>Primers for Trilineage assay</b>    |                                                           |                                                                                                                                                                                                                                                                  |
| <i>OCT4</i>                            | Integrated DNA Technologies                               | Forward GGGCTCTCCCATGCATTCAAAC<br>Reverse CACCTTCCCTCCAACCAAGTTGC                                                                                                                                                                                                |
| <i>NANOG</i>                           | Integrated DNA Technologies                               | Forward TGGGATTTACAGGCGTGAGCCAC<br>Reverse AAGCAAAGCCTCCCAATCCCAAAC                                                                                                                                                                                              |
| <i>GAPDH</i>                           | Integrated DNA Technologies                               | Harvard PrimerBank, ID: 378404907c2<br>Forward ACAACTTTGGTATCGTGGAAGG<br>Reverse GCCATCACGCCACAGTTTC                                                                                                                                                             |
| <i>GATA3</i>                           | Integrated DNA Technologies                               | Forward TGGAGGAGGAATGCCAATGGG<br>Reverse GCCGGGTTAAACGAGCTGTTCTTG                                                                                                                                                                                                |
| <i>PAX6</i>                            | Integrated DNA Technologies                               | Harvard Primer Bank, ID: 189083679c1<br>Forward TGGGCAGGTATTACGAGACTG<br>Reverse ACTCCCGTTATACTGGGCTA                                                                                                                                                            |
| <i>CDX2</i>                            | Integrated DNA Technologies                               | Forward CTGGAGCTGGAGAAGGAGTTTCAC<br>Reverse GACACTTCTCAGAGGACCTGGCTG                                                                                                                                                                                             |
| <i>SOX17</i>                           | Integrated DNA Technologies                               | Harvard Primer Bank, ID:145275218c1<br>Forward GTGGACCGCACGGAATTTG<br>Reverse GGAGATTCACACCGGAGTCA                                                                                                                                                               |

|                                            |                                                                                                        |                                                                                                                                                                     |
|--------------------------------------------|--------------------------------------------------------------------------------------------------------|---------------------------------------------------------------------------------------------------------------------------------------------------------------------|
| <i>TBXT</i>                                | Integrated DNA Technologies                                                                            | Forward<br>ACAATGCCAGCCCACCTACCAG<br>Reverse<br>CGTACTGGCTGTCCACGATGTCTG                                                                                            |
| <i>NCAM</i>                                | Integrated DNA Technologies                                                                            | Harvard Primer Bank, ID:316659209c1<br>Forward<br>GGGGTTGCTTGTTCAGTAGC<br>Reverse<br>TTCAGGTTACCAATCGCTGT                                                           |
| <b>SOFTWARE AND ALGORITHMS</b>             |                                                                                                        |                                                                                                                                                                     |
| Image Studio™ Lite                         | LI-COR                                                                                                 | <a href="https://www.licor.com/bio/image-studio-lite/download">https://www.licor.com/bio/image-studio-lite/download</a>                                             |
| Fiji                                       | Schindelin et al., 2012                                                                                | <a href="https://imagej.net/Fiji">https://imagej.net/Fiji</a>                                                                                                       |
| GraphPad Prism v8.1.2                      | GraphPad                                                                                               | <a href="https://www.graphpad.com/scientific-software/prism/">https://www.graphpad.com/scientific-software/prism/</a>                                               |
| NIS-Elements                               | Nikon Instruments                                                                                      | <a href="https://www.microscope.healthcare.nikon.com/products/software/nis-elements">https://www.microscope.healthcare.nikon.com/products/software/nis-elements</a> |
| MetaboAnalyst 4.0                          | (Chong and Xia, 2018; Chong et al., 2018, 2019; Xia and Wishart, 2010, 2011a, 2011b; Xia et al., 2009) | <a href="https://www.metaboanalyst.ca/home.xhtml">https://www.metaboanalyst.ca/home.xhtml</a>                                                                       |
| Snpsift                                    | (Cingolani et al., 2012)                                                                               | <a href="http://snpeff.sourceforge.net/SnpSift.html">http://snpeff.sourceforge.net/SnpSift.html</a>                                                                 |
| R 3.5.3                                    | R Foundation                                                                                           | <a href="https://www.r-project.org/">https://www.r-project.org/</a>                                                                                                 |
| BioCircos                                  | (Cui et al., 2016)                                                                                     | <a href="https://cran.r-project.org/web/packages/BioCircos/index.html">https://cran.r-project.org/web/packages/BioCircos/index.html</a>                             |
| <b>OTHER</b>                               |                                                                                                        |                                                                                                                                                                     |
| Mitotracker Red CMXRos                     | Fisher Scientific                                                                                      | Cat # M7512                                                                                                                                                         |
| Matrigel™                                  | Corning                                                                                                | Cat # 354277                                                                                                                                                        |
| Gentle dissociation solution               | STEMCELL Technologies                                                                                  | Cat # 07174                                                                                                                                                         |
| AggreWell™ 800 24-well plate               | STEMCELL Technologies                                                                                  | Cat # 34815                                                                                                                                                         |
| AggreWell™ Rinsing Solution                | STEMCELL Technologies                                                                                  | Cat # 07010                                                                                                                                                         |
| STEMdiff™ Cerebral Organoid Kit            | STEMCELL Technologies                                                                                  | Cat # 08570                                                                                                                                                         |
| STEMdiff™ Cerebral Organoid Maturation Kit | STEMCELL Technologies                                                                                  | Cat # 08571                                                                                                                                                         |

520

521 **Lead Contact and Materials Availability**

522 Further information and requests for resources and reagents should be directed to the Lead

523 Contact, Vivian Gama ([vivian.gama@vanderbilt.edu](mailto:vivian.gama@vanderbilt.edu)).

524



## 525 **Experimental Model and Subject Details**

526 The Coriell cell line IDs were as follows: GM01503, GM03672, GM1341. Information about the  
527 Leigh syndrome cell lines used in this study can be found in Supplementary Table1. Control skin  
528 fibroblast cell line AG16409 was also obtained from Coriell Institute, Philadelphia, PA. The donor  
529 was a 12-year-old apparently healthy Caucasian male.

530 Fibroblasts were maintained in Dulbecco's Modified Eagle Medium: Nutrient Mixture F-12  
531 DMEM/F-12 (Gibco cat # 11330032) supplemented with 10% Fetal bovine serum (Sigma cat#  
532 F2442) in 100mm cell culture plates (Eppendorf, cat # 0030702115) in a 37°C 5% CO2 incubator.

533

## 534 **Method Details**

### 535 **Whole Exome sequencing**

536 Fibroblast cell pellets from each cell line (>1 million cells) were shipped on dry ice for whole  
537 genome exome sequencing to Genewiz, Plainfield, NJ. The Illumina HiSeq-X was used to perform  
538 150nt paired-end sequencing.

539

### 540 **Mitochondrial sequencing**

541 Fibroblast cell pellets from each patient (>1 million cells) were shipped on dry ice for mitochondrial  
542 sequencing to Girihlet Inc. Oakland, CA. The sequencing configuration used was 80bp single-end  
543 sequencing, 20 million reads per sample.

544

### 545 **hiPSC Generation and Characterization**

546 Human fibroblasts were purchased from healthy control and patients (Coriell Institute,  
547 Philadelphia, PA, USA). Induced pluripotent stem cells were derived from human fibroblasts using  
548 Sendai virus-based reprogramming kit (CytoTune-iPS Sendai Reprogramming Kit; cat #. A13780-  
549 01; Thermo Fisher), according to manufacturer's instructions. After 3-4 weeks, 2-3 colonies per  
550 sample were transferred to fresh 6-well plates and were expanded and gardened for 3 passages

551 before freezing. All iPSC cell lines were maintained in E8 medium in plates coated with Matrigel  
552 (Corning, cat # 354277) at 37°C with 5% CO<sub>2</sub>. Culture medium was changed daily. Cells were  
553 checked daily for differentiation and were passaged every 3-4 days using Gentle dissociation  
554 solution (STEMCELL Technologies, cat # 07174). All experiments were performed under the  
555 supervision of the Vanderbilt Institutional Human Pluripotent Cell Research Oversight (VIHPCRO)  
556 Committee.

557

### 558 **Analysis of Pluripotency**

559 Pluripotency of each iPSC clone was determined using a microarray-based tool known as  
560 PluriTest (Thermo Fisher; cat# A38154) as an alternative to the teratoma assay. Samples were  
561 outsourced to Thermo Fisher for PluriTest and further analysis. Low passage iPSC cell pellets  
562 (>1 million cells) were frozen and shipped on dry ice. Additionally, expression of pluripotency  
563 genes POU5F1 and NANOG was assessed by qPCR.

564

### 565 **Analysis of Chromosomal abnormalities**

566 The presence of any chromosomal abnormalities in the newly generated iPSCs was determined  
567 using a microarray-based tool known as KaryoStat (Thermo Fisher; cat# A38153) as an  
568 alternative to chromosomal G-banding. Samples were outsourced to Thermo Fisher for KaryoStat  
569 and further analysis. Low passage iPSC cell pellets (>1 million cells) were frozen and shipped on  
570 dry ice to Thermo Fisher.

571

### 572 **Trilineage differentiation**

573 The STEMdiff Trilineage differentiation kit (STEMCELL Technologies, cat# 05230) was used to  
574 functionally validate the ability of newly established iPSCs to differentiate into three germ layers,  
575 as per the manufacturer's instructions. Single cell suspensions of 2x10<sup>6</sup> cells/well, 5x10<sup>5</sup>  
576 cells/well, 2x10<sup>6</sup> cells/well were seeded for ectoderm, mesoderm and endoderm, respectively, in

577 their corresponding medium at day 0 in 6 well plates. The cultures were maintained for 7 days, 5  
578 days, and 5 days for ectoderm, mesoderm, and endoderm, respectively. The differentiation was  
579 assessed by immunocytochemistry and qPCR.

580

### 581 **NPC differentiation and multipotency characterization**

582 For monolayer differentiation of the iPSCs into NPCs, cells were dissociated into single cells using  
583 Gentle Cell Dissociation Reagent (STEMCELL Technologies, cat # 07174) for 8 minutes at 37°C.  
584 Live cell counts were performed using Trypan blue (0.4%) staining (Invitrogen, cat # T10282)  
585 using a Countess™ Automated Cell Counter. Cell were then seeded in a Matrigel coated 6-well  
586 plate (Eppendorf, cat # 0030720113) to a  $2.5 \times 10^6$  cells/well with dual SMAD inhibitor media  
587 supplemented with Dorsomorphin (1 $\mu$ M) and SB431542 (10 $\mu$ M) (Chambers et al., 2009)  
588 supplemented with ROCK inhibitor. Daily media changes were performed and passaging of the  
589 cells was done every 7-9 days. Cells for NPC marker analysis were collected at the end of the  
590 first 9 days of differentiation.

591 Mitochondrial imaging was performed by adding 100nM MitoTracker Red CMXRos (Thermo  
592 Fisher Scientific #M7512) to the media for 20 minutes before PFA fixation. Super-resolution  
593 images were acquired using a Nikon SIM microscope equipped with a 1.49 NA 100x Oil objective  
594 an Andor DU-897 EMCCD camera.

595 For multipotency analysis, culture media was changed to NeuroCult™ media and maintained for  
596 4 weeks. Samples were then fixed and stained for neuron and oligodendrocyte markers. Astrocyte  
597 differentiation was performed by seeding on a Matrigel coated plate  $1.5 \times 10^6$  cells/cm<sup>2</sup> (TCW et  
598 al., 2017). The following day, media was changed to Astrocyte medium (ScienCell, cat # 1801)  
599 and maintained for 20 days. Full media changes were done every 2 days. Samples were then  
600 fixed and stained for an astrocyte marker. Images were acquired with a Nikon Ti Eclipse  
601 microscope equipped with a Nikon DS-Qi2 camera and 0.75 NA 20X air objective.

602

## 603 **Neural rosette differentiation**

604 To generate neural rosettes, we dissociated the cells into single cell suspension and seeded  
605  $3.0 \times 10^6$  cells/well of an AggreWell™ 800 in dual SMAD inhibitor media. EBs were incubated at  
606 37°C with 5% CO<sub>2</sub>, with minimal disruption during the first 48 hours. Media changes, 50-75% of  
607 the total volume, were performed every 2 days. On Day 5, EBs were harvested according to the  
608 manufacturer protocol and transferred to a 35mm imaging plate (Cellvis, cat # D35-14-1.5-N)  
609 coated with Matrigel. Daily media changes were performed up to day 9 when cells were fixed with  
610 100% ice-cold Methanol (Fisher Scientific, cat # A454-4). Images were acquired with an Andor  
611 DU-897 EMCCD camera mounted on a Nikon Spinning Disk Microscope equipped with a 0.45  
612 NA 10X and 0.75 NA 20X objectives. Data analysis was performed using NIS Elements. A *Neural*  
613 *Rosette Quantification* macro was developed to measure the rosette lumen area based on the  
614 ZO-1 staining channel. Max IPs were generated per ROI, followed by advanced denoise of the  
615 image. Binary mask intensity thresholding for the ZO-1 was done using control images. Measured  
616 data was exported to an Excel file.

617

## 618 **Cerebral Organoids**

619 Cerebral organoids were generated as described in (Romero-Morales et al., 2019) with some  
620 modifications. Briefly, organoids were generated using the STEMdiff™ Cerebral Organoid Kit  
621 (STEMCELL Technologies; Cat# 08571, 08570). iPSCs were dissociated into single cells using  
622 Gentle Cell Dissociation Reagent (STEMCELL Technologies, cat # 07174) for 8 minutes at 37°C.  
623 Homogeneous and reproducible EBs were generated by using 24-well plate AggreWell™ 800  
624 (STEMCELL Technologies, cat # 34815). On Day 7, high quality EBs were embedded in Matrigel  
625 (Corning, cat # 354277). On Day 10, the Matrigel coat was broken by vigorously pipetting up and  
626 down and the healthy organoids were transferred to a 60mm low attachment culture plate  
627 (Eppendorf, cat # 003070119). The plates were then moved to a 37°C incubator and to a Celltron  
628 benchtop shaker for CO<sub>2</sub> incubators (Infors USA, cat # I69222) set at 85rpm. Full media changes

629 were performed every 3–4 days. Transmitted-light images were acquired using an EVOS® XL  
630 Core Imaging System. The software used for processing was ImageJ.

631

### 632 **Organoid tissue preparation and Immunohistochemistry**

633 Tissue preparation was performed as described in (Romero-Morales et al., 2019). Briefly,  
634 organoids were fixed in 4% Paraformaldehyde in Phosphate Buffered Saline (PBS), washed 3  
635 times with PBS and then incubated in 30% sucrose solution overnight at 4°C. Organoids were  
636 embedded in 7.5% gelatin/10% sucrose solution (Sigma, catalog G1890-100G and S7903-250G)  
637 and sectioned with a cryostat (Leica CM1950) at 15um thickness. For immunostaining, slides  
638 were washed with PBS before permeabilization with 0.2% Triton-X in PBS for 1 hr. Tissues were  
639 blocked with blocking medium consisting of 10% donkey serum in PBS with 0.1% Tween-20  
640 (PBST) for 30 min. Incubation with primary and secondary antibodies was done using standard  
641 methods. Confocal images of the organoids were acquired using an Andor DU-897 EMCCD  
642 camera mounted on a Nikon Spinning Disk Microscope 0.45 NA 10X and 0.75 NA 20X air  
643 objectives (macro structures) and 1.49 NA 100x oil objective (mitochondria imaging). The  
644 software used for image acquisition and reconstruction was NIS-Elements Viewer (Nikon).

645

### 646 **RNA Extraction and Synthesis of cDNA**

647 Cells cultured in 6 well plate, were collected after a wash with PBS, using 600µl Trizol reagent.  
648 The samples were spun down at 12,000 g after addition 130 µl of chloroform and incubated at  
649 room temperature for 3 minutes. The aqueous phase of the sample was collected 200µl at a time  
650 until reaching the edge of phase separation. RNA precipitation was done by incubating with 300µl  
651 of isopropanol for 25 minutes, followed by centrifugation at 12,000 g for 10 min at 4°C. RNA pellet  
652 was washed with ethanol, semidried, and resuspended in 30µl of DEPC water. After quantification  
653 and adjusting volume of all the sample to 1µg/µl, the samples were treated with DNase (New

654 England Biolabs, cat # M0303). 10 $\mu$ l of this volume was used to generate cDNA using  
655 manufacturer's protocol (ThermoFisher, cat#4368814)

656

### 657 **Quantitative RT PCR**

658 1 $\mu$ g of cDNA sample was used to run a q-PCR for the primers mentioned in the table. QuantStudio  
659 3 Real-Time PCR machine, SYBR green master mix (Thermo Fisher, cat#4364346) and  
660 manufacturer instructions were used to set up the assay.

661

### 662 **Immunocytochemistry**

663 Cells were fixed with 4% paraformaldehyde (Electron Microscopy Sciences, cat # 15710-S) in  
664 PBS for 20 min at 4°C. Blocking and permeabilization were done in 5% Donkey serum (Jackson  
665 ImmunoResearch Inc, cat # 017-000-121) + 0.3% Triton X-100 (Sigma Aldrich, cat # T9284) in  
666 TBS for 1 hr at room temperature. After this, cells were treated with primary and secondary  
667 antibodies using standard methods. Cells were mounted in Vectashield (Vector Laboratories, cat  
668 # H-1000) prior to imaging.

669

### 670 **Western Blotting**

671 Cultured cells were lysed in 1% Triton buffer containing PMSF (ThermoFisher Scientific, cat #  
672 36978), PhosSTOP (Roche, cat # 4906837001), and protease inhibitor cocktail (Roche, cat #  
673 4693132001). Protein concentrations were determined using the bicinchoninic acid (BCA) method  
674 (Thermo Scientific, cat # 23227). Gel samples were prepared by mixing 30 $\mu$ g of protein with LDS  
675 sample buffer (Life Technologies, cat # NP0007) and 2-Mercaptoethanol (BioRad, cat # 1610710)  
676 and boiled at 95°C for 5 minutes. Samples were run on 4-20% Mini-PROTEAN TGX precast gels  
677 (BioRad, cat # 4561096) and transferred onto polyvinylidene difluoride (PVDF) membrane  
678 (BioRad, cat # 1620177) overnight at 4°C. Membranes were blocked in 5% milk in TBST prior to

679 primary antibody incubation. Antibodies used for Western blotting are described in Key Resource  
680 table.

681

### 682 **Cell titer blue assay**

683 After the 24-h exposure to individual treatments of 50 $\mu$ M etoposide, 80 $\mu$ M CCCP, 100ng/mL  
684 nocodazole, and 5ng/mL neocarzinostatin, 20  $\mu$ l of Cell Titer Blue reagent from Cell Titer Blue  
685 assay (Promega, cat # G8081) was added to each well of 96 well plate. Background fluorescence  
686 was calculated by adding 10% Triton in PBS to some wells. The fluorescence generated by the  
687 reduction of resazurin to resorufin by live cells was measured using a Beckman coulter DTX 880  
688 multimode plate reader (Beckman Coulter, Brea, California) (570/600 nm).

689

### 690 **Metabolomics analysis**

691 Neuralized embryoid bodies were generated by seeding 3x10<sup>6</sup> cells/well in an Aggwell800™.  
692 Media change was performed at day 2 and 4. On day 5, EBs were transferred to a low attachment  
693 60mm plate and maintained in suspension with daily media changes. On day 10, ~150 EBs were  
694 collected in a 1.5mL centrifuge tube, rinsed with ice-cold sterile 0.9% NaCl and flash-frozen in  
695 liquid nitrogen. For organoids, at least 4 individual organoids were collected at day 40, rinsed with  
696 ice-cold sterile 0.9% NaCl and flash-freeze in liquid nitrogen.

697 For metabolite extraction, cells were resuspended in 225 $\mu$ L of cold 80% HPLC grade  
698 methanol/20% HPLC grade water per 1x10<sup>6</sup> cells. After resuspension, cells were flash frozen in  
699 liquid nitrogen and thawed rapidly in 37°C water bath 3 times. Next debris were removed by  
700 centrifugation at max speed in a tabletop microcentrifuge at 4°C for 15 min. Metabolite-containing  
701 supernatant was transfer to a new tube, dried, and resuspended in 50% acetonitrile while the  
702 pellet was used for protein quantification. Samples were analyzed by Ultra-High-Performance  
703 Liquid Chromatography and High-Resolution Mass Spectrometry and Tandem Mass  
704 Spectrometry (UHPLC-MS/MS). Specifically, the system consisted of a Thermo Q-Exactive in line

705 with an electrospray source and an Ultimate3000 (Thermo) series HPLC consisting of a binary  
706 pump, degasser, and auto-sampler outfitted with an Xbridge Amide column (Waters; dimensions  
707 of 4.6mm × 100mm and a 3.5µm particle size). Mobile phase A contained 95% (vol/vol) water,  
708 5% (vol/vol) acetonitrile, 10mM ammonium hydroxide, 10mM ammonium acetate, pH = 9.0; and  
709 mobile phase B was 100% Acetonitrile. The gradient was as follows: 0 min, 15% A; 2.5 min, 30%  
710 A; 7 min, 43% A; 16 min, 62% A; 16.1-18 min, 75% A; 18-25 min, 15% A with a flow rate of  
711 400µL/min. The capillary of the ESI source was set to 275°C, with sheath gas at 45 arbitrary units,  
712 auxiliary gas at 5 arbitrary units, and the spray voltage at 4.0kV. In positive/negative polarity  
713 switching mode, an m/z scan range from 70 to 850 was chosen and MS1 data was collected at a  
714 resolution of 70,000. The automatic gain control (AGC) target was set at  $1 \times 10^6$  and the maximum  
715 injection time was 200 ms. The top 5 precursor ions were subsequently fragmented, in a data-  
716 dependent manner, using the higher energy collisional dissociation (HCD) cell set to 30%  
717 normalized collision energy in MS2 at a resolution power of 17,500. Data acquisition and analysis  
718 were carried out by Xcalibur 4.1 software and Tracefinder 4.1 software, respectively (both from  
719 Thermo Fisher Scientific). The peak area for each detected metabolite was normalized by the  
720 total ion current which was determined by integration of all of the recorded peaks within the  
721 acquisition window.

722

## 723 **Bioinformatic Analysis**

724 Bioinformatic analysis began with Variant Call Format (VCF) files provided by GENEWIZ (see  
725 *Whole Exome sequencing* section above), both for SNP and indels. SnpSift version 4.3t (PMID:  
726 22435069) was used to process and filter these files for downstream analysis. Details extracted  
727 included gene symbol, Entrez gene ID and name, UniProt ID, Ensembl ID, chromosome and  
728 position, reference variant, alternative variant, quality of the call, allele name, type of SNP, impact  
729 of the SNP, and the genotype of each sample. From these filtered outputs, we generated



730 SNP/indel reports that allowed us to look at sample-specific SNPs and indels, as well as perform  
731 aggregate-level functions for grouping and statistical analysis.

732 To generate the SNP/indel circular chromosome plots, the top 20 genes that had variants in all  
733 three samples were plotted, ranked by frequency of variants per gene. The outside track is used  
734 to visualize the chromosomes and marked gene locations. For each sample, we used a single  
735 track to show the variant frequency as a circular scatter plot, with the height of the scatter points  
736 representative of the variant quality metric, which is a Phred-scaled probability that a REF/ALT  
737 polymorphism exists at the variant site. Similarly, for SNPs in the mitochondrial chromosome, we  
738 used the same approach for visualization.

739

#### 740 **Quantification and Statistical Analysis**

741 No statistical methods were used to pre-determine sample sizes. All experiments were performed  
742 with a minimum of 3 biological replicates, unless specified. Statistical significance was determined  
743 by unpaired Student's t-test or by one- or two-way ANOVA as appropriate for each experiment.  
744 GraphPad Prism v8.1.2 was used for all statistical analysis and data visualization.

745 Error bars in all bar graphs represent standard error of the mean or standard deviation as  
746 described for each Figure, while scattered dot plots were represented with boxes (with median  
747 and SD) and whiskers (minimum and maximum values).

748 For neural rosette experiments, ROI were randomly selected using the nuclear (DAPI) staining  
749 channel. Images were processed with NIS Elements software with our Neural rosette lumen  
750 identification Macro. Outliers were removed from the neural rosette area analysis as post-  
751 processing quality control for the NIS Element macro using GraphPad Prism v8.1.2. ROUT  
752 (Robust regression and Outlier removal) method was used with a False Discovery Rate of 1%.

753 For cerebral organoid experiments, 4 independent batches were generated. At timepoints day 30  
754 and day100, at least 5 organoids per cell line were collected. Immunofluorescence images of at  
755 least 3 independent organoids were acquired per condition slide. Image processing was done by

756 NIS Elements and Fiji software. Organoid efficiency evaluation was performed at day 10 using  
757 4X transmitted-light images acquired using an EVOS® XL microscope. Two observers were  
758 blinded to the cell line identifier and counted the number of normal and defective (no epithelial  
759 buds or more than 75% of the area is not developed) organoids. Criteria for normal and defective  
760 organoids was based on (Lancaster and Knoblich, 2014).

761 For the metabolomics experiments, two independent LC/MS runs of ~150-200 neuralized EBs/cell  
762 line/replica were utilized with enough material to account for  $3 \times 10^6$  cells/run. For the cerebral  
763 organoid metabolomics, one replica of day 40 organoids was performed, with 4 samples per  
764 genotype.

765

#### 766 **Software and Data Availability**

767 All raw data in FastQ format for whole exome sequencing and mitochondrial sequencing have  
768 been deposited to the Short Read Archive as BioProject PRJNA626388, available at  
769 <https://www.ncbi.nlm.nih.gov/sra/PRJNA626388>. All source code and document are available via  
770 <https://vandydata.github.io/Romero-Morales-Gama-Leigh-Syndrome-WES/>.

771

#### 772 **Author contributions**

773 A.R.M. and V.G. designed experiments, interpret the data and wrote the manuscript. A.R.M., A.R.,  
774 and M.L.R. performed experiments and analyzed data with technical support of H.T. J.P.C. and  
775 L.H. analyzed the genomic data, generated the corresponding figures and the associated method  
776 section. P.M.A provided the pluripotency data analysis and technical support for data analysis.  
777 B.M generated the neural rosette analysis macro for NIS Elements. N.S.C. and G.S.M provided  
778 technical support, led experimental design and data analysis for metabolomics and its  
779 corresponding method section.

780

#### 781 **Conflict of interests**

782 The authors declare no competing interests.

783

#### 784 **Acknowledgements**

785 We thank Dr. Nicholas Mignemi (Vanderbilt Nikon Center for Excellence) for his technical support  
786 with image acquisition and processing. We would like to thank members of the Gama Laboratory  
787 for helpful discussions and comments to the manuscript. Funding was provided by the following  
788 grants: 1R35GM128915-01 (to VG); 1R21 CA227483-01A1 (to VG); the Precision Medicine and  
789 Mental Health Initiative sponsored by the Vanderbilt Brain Institute (to VG). Image acquisition and  
790 analysis were performed in part through the use of the Nikon Center of Excellence within the  
791 Vanderbilt Cell Imaging Shared Resource (supported by NIH grants CA68485, DK20593,  
792 DK58404, DK59637 and EY08126), Vanderbilt University Medical Center's Translational  
793 Pathology Shared Resource supported by NCI/NIH Cancer Center Support Grant 2P30  
794 CA068485-14, and the Vanderbilt Mouse Metabolic Phenotyping Center Grant 5U24DK059637-  
795 13. Whole exome sequencing and mitochondrial sequencing results were analyzed by Creative  
796 Solutions. Metabolite measurements were performed by the Northwestern University RHLCCC  
797 Metabolomics Core (Peng Gao) and were supported by the following NIH grants to N.S.C.:  
798 NIH2PO1HL071643-11A1, NIH1R35CA197532-01, NIH1PO1AG049665-01 and NIH/NCI grant  
799 to G.S.M: T32CA09560.

800

## 801 References

- 802  
803 Agana, M., Frueh, J., Kamboj, M., Patel, D.R., and Kanungo, S. (2018). Common metabolic  
804 disorder (inborn errors of metabolism) concerns in primary care practice. *Ann. Transl. Med.*  
805 *6*, 469–469.
- 806 Albright, C.D., Friedrich, C.B., Brown, E.C., Mar, M.H., and Zeisel, S.H. (1999a). Maternal dietary  
807 choline availability alters mitosis, apoptosis and the localization of TOAD-64 protein in the  
808 developing fetal rat septum. *Dev. Brain Res.* *115*, 123–129.
- 809 Albright, C.D., Tsai, A.Y., Friedrich, C.B., Mar, M.-H., and Zeisel, S.H. (1999b). Choline availability  
810 alters embryonic development of the hippocampus and septum in the rat. *Dev. Brain Res.*  
811 *113*, 13–20.
- 812 Angelova, M.T., Dimitrova, D.G., Dinges, N., Lence, T., Worpenberg, L., Carré, C., and Roignant,  
813 J.Y. (2018). The emerging field of epitranscriptomics in neurodevelopmental and neuronal  
814 disorders. *Front. Bioeng. Biotechnol.* *6*, 46.
- 815 Baertling, F., Rodenburg, R.J., Schaper, J., Smeitink, J.A., Koopman, W.J.H., Mayatepek, E.,  
816 Morava, E., and Distelmaier, F. (2014). A guide to diagnosis and treatment of Leigh  
817 syndrome. *J. Neurol. Neurosurg. Psychiatry* *85*, 257–265.
- 818 Baertling, F., Klee, D., Haack, T.B., Prokisch, H., Meitinger, T., Mayatepek, E., Schaper, J., and  
819 Distelmaier, F. (2016). The many faces of paediatric mitochondrial disease on  
820 neuroimaging. *Child's Nerv. Syst.* *32*, 2077–2083.
- 821 Barshop, B.A. (2004). Metabolomic approaches to mitochondrial disease: Correlation of urine  
822 organic acids. *Mitochondrion* *4*, 521–527.
- 823 Bridi, R., Latini, A., Braum, C.A., Zorzi, G.K., Wajner, M., Lissi, E., and Dutra-Filho, C.S. (2005).  
824 Evaluation of the mechanisms involved in leucine-induced oxidative damage in cerebral  
825 cortex of young rats. *Free Radic. Res.* *39*, 71–79.
- 826 Buzkova, J., Nikkanen, J., Ahola, S., Hakonen, A.H., Sevastianova, K., Hovinen, T., Yki-Järvinen,  
827 H., Pietiläinen, K.H., Lönnqvist, T., Velagapudi, V., et al. (2018). Metabolomes of  
828 mitochondrial diseases and inclusion body myositis patients: treatment targets and  
829 biomarkers. *EMBO Mol. Med.* *10*.
- 830 Calvo, S., Jain, M., Xie, X., Sheth, S.A., Chang, B., Goldberger, O.A., Spinazzola, A., Zeviani, M.,  
831 Carr, S.A., and Mootha, V.K. (2006). Systematic identification of human mitochondrial  
832 disease genes through integrative genomics. *Nat. Genet.* *38*, 576–582.
- 833 Calvo, S.E., Compton, A.G., Hershman, S.G., Lim, S.C., Lieber, D.S., Tucker, E.J., Laskowski,  
834 A., Garone, C., Liu, S., Jaffe, D.B., et al. (2012). Molecular diagnosis of infantile  
835 mitochondrial disease with targeted next-generation sequencing. *Sci. Transl. Med.* *4*,  
836 118ra10–118ra10.
- 837 Camp, J.G., Badsha, F., Florio, M., Kanton, S., Gerber, T., Wilsch-Bräuning, M., Lewitus, E.,  
838 Sykes, A., Hevers, W., Lancaster, M., et al. (2015). Human cerebral organoids recapitulate  
839 gene expression programs of fetal neocortex development. *Proc. Natl. Acad. Sci.* *112*,  
840 201520760.
- 841 Cansev, M. (2006). Uridine and cytidine in the brain: Their transport and utilization. *Brain Res.*  
842 *Rev.* *52*, 389–397.
- 843 Cerutti, R., Pirinen, E., Lamperti, C., Marchet, S., Sauve, A.A., Li, W., Leoni, V., Schon, E.A.,  
844 Dantzer, F., Auwerx, J., et al. (2014). NAD<sup>+</sup>-dependent activation of Sirt1 corrects the  
845 phenotype in a mouse model of mitochondrial disease. *Cell Metab.* *19*, 1042–1049.
- 846 Chambers, S.M., Fasano, C.A., Papapetrou, E.P., Tomishima, M., Sadelain, M., and Studer, L.  
847 (2009). Highly efficient neural conversion of human ES and iPS cells by dual inhibition of  
848 SMAD signaling. *Nat. Biotechnol.* *27*, 275–280.
- 849 Chandrasekaran, A., Avci, H.X., Ochalek, A., Rösingh, L.N., Molnár, K., László, L., Bellák, T.,  
850 Téglási, A., Pesti, K., Mike, A., et al. (2017). Comparison of 2D and 3D neural induction

- 851 methods for the generation of neural progenitor cells from human induced pluripotent stem  
852 cells. *Stem Cell Res.* 25, 139–151.
- 853 Chen, H., and Chan, D.C. (2017). Mitochondrial Dynamics in Regulating the Unique Phenotypes  
854 of Cancer and Stem Cells. *Cell Metab.* 26, 39–48.
- 855 Chong, J., and Xia, J. (2018). MetaboAnalystR: an R package for flexible and reproducible  
856 analysis of metabolomics data. *Bioinformatics* 34, 4313–4314.
- 857 Chong, J., Soufan, O., Li, C., Caraus, I., Li, S., Bourque, G., Wishart, D.S., and Xia, J. (2018).  
858 MetaboAnalyst 4.0: towards more transparent and integrative metabolomics analysis.  
859 *Nucleic Acids Res.* 46, W486–W494.
- 860 Chong, J., Wishart, D.S., and Xia, J. (2019). Using MetaboAnalyst 4.0 for Comprehensive and  
861 Integrative Metabolomics Data Analysis. *Curr. Protoc. Bioinforma.* 68.
- 862 Cingolani, P., Patel, V.M., Coon, M., Nguyen, T., Land, S.J., Ruden, D.M., and Lu, X. (2012).  
863 Using *Drosophila melanogaster* as a model for genotoxic chemical mutational studies with  
864 a new program, SnpSift. *Front. Genet.* 3, 35.
- 865 Craigen, W.J. (1996). Leigh disease with deficiency of lipoamide dehydrogenase: Treatment  
866 failure with dichloroacetate. *Pediatr. Neurol.* 14, 69–71.
- 867 Craven, L., Alston, C.L., Taylor, R.W., and Turnbull, D.M. (2017). Recent Advances in  
868 Mitochondrial Disease. *Annu. Rev. Genomics Hum. Genet.* 18, 257–275.
- 869 Cui, Y., Chen, X., Luo, H., Fan, Z., Luo, J., He, S., Yue, H., Zhang, P., and Chen, R. (2016).  
870 BioCircos.js: An interactive Circos JavaScript library for biological data visualization on web  
871 applications. *Bioinformatics* 32, 1740–1742.
- 872 Das, A.M., Steuerwald, U., and Illsinger, S. (2010). Inborn errors of energy metabolism associated  
873 with myopathies. *J. Biomed. Biotechnol.* 2010.
- 874 Diez-Roux, G., Banfi, S., Sultan, M., Geffers, L., Anand, S., Rozado, D., Magen, A., Canidio, E.,  
875 Pagani, M., Peluso, I., et al. (2011). A high-resolution anatomical atlas of the transcriptome  
876 in the mouse embryo. *PLoS Biol.* 9, e1000582.
- 877 Elkabetz, Y., Panagiotakos, G., Al Shamy, G., Socci, N.D., Tabar, V., and Studer, L. (2008).  
878 Human ES cell-derived neural rosettes reveal a functionally distinct early neural stem cell  
879 stage. *Genes Dev.* 22, 152–165.
- 880 Esterhuizen, K., van der Westhuizen, F.H., and Louw, R. (2017). Metabolomics of mitochondrial  
881 disease. *Mitochondrion* 35, 97–110.
- 882 Fang, Q., Zhang, Y., Chen, X., Li, H., Cheng, L., Zhu, W., Zhang, Z., Tang, M., Liu, W., Wang, H.,  
883 et al. (2020). Three-Dimensional Graphene Enhances Neural Stem Cell Proliferation  
884 Through Metabolic Regulation. *Front. Bioeng. Biotechnol.* 7, 436.
- 885 Feeney, C.L., Lim, A.Z., Fagan, E., Blain, A., Bright, A., Maddison, J., Devine, H., Stewart, J.,  
886 Taylor, R.W., Gorman, G.S., et al. (2019). A case-comparison study of pregnant women  
887 with mitochondrial disease – what to expect? *BJOG An Int. J. Obstet. Gynaecol.* 126, 1380–  
888 1389.
- 889 Ferlin, T., Landrieu, P., Rambaud, C., Fernandez, H., Dumoulin, R., Rustin, P., and Mousson, B.  
890 (1997). Segregation of the G8993 mutant mitochondrial DNA through generations and  
891 embryonic tissues family at risk of Leigh syndrome. *J. Pediatr.* 131, 447–449.
- 892 Ferrari, M., Jain, I.H., Goldberger, O., Rezoagli, E., Thoonen, R., Chen, K.-H., Sosnovik, D.E.,  
893 Scherrer-Crosbie, M., Mootha, V.K., and Zapol, W.M. (2017). Hypoxia treatment reverses  
894 neurodegenerative disease in a mouse model of Leigh syndrome. *Proc. Natl. Acad. Sci.*  
895 114, E4241–E4250.
- 896 Ferreira, G.C., and McKenna, M.C. (2017). I-Carnitine and Acetyl-I-carnitine Roles and  
897 Neuroprotection in Developing Brain. *Neurochem. Res.* 42, 1661–1675.
- 898 Finsterer, J. (2008). Leigh and Leigh-Like Syndrome in Children and Adults. *Pediatr. Neurol.* 39,  
899 223–235.
- 900 Florio, M., and Huttner, W.B. (2014). Neural progenitors, neurogenesis and the evolution of the  
901 neocortex. *Development* 141, 2182–2194.

- 902 Galera-Monge, T., Zurita-Díaz, F., González-Páramos, C., Moreno-Izquierdo, A., Fraga, M.F.,  
903 Fernández, A.F., Garesse, R., and Gallardo, M.E. (2016). Generation of a human iPSC line  
904 from a patient with Leigh syndrome caused by a mutation in the MT-ATP6 gene. *Stem Cell*  
905 *Res.* *16*, 766–769.
- 906 García-Cazorla, A., Oyarzabal, A., Fort, J., Robles, C., Castejón, E., Ruiz-Sala, P., Bodoy, S.,  
907 Merinero, B., Lopez-Sala, A., Dopazo, J., et al. (2014). Two Novel Mutations in the BCKDK  
908 (Branched-Chain Keto-Acid Dehydrogenase Kinase) Gene Are Responsible for a  
909 Neurobehavioral Deficit in Two Pediatric Unrelated Patients. *Hum. Mutat.* *35*, 470–477.
- 910 Gerards, M., Sallevelt, S.C.E.H., and Smeets, H.J.M. (2016). Leigh syndrome: Resolving the  
911 clinical and genetic heterogeneity paves the way for treatment options. *Mol. Genet. Metab.*  
912 *117*, 300–312.
- 913 Gogos, J.A., Santha, M., Takacs, Z., Beck, K.D., Luine, V., Lucas, L.R., Nadler, J.V., and  
914 Karayiorgou, M. (1999). The gene encoding proline dehydrogenase modulates  
915 sensorimotor gating in mice. *Nat. Genet.* *21*, 434–439.
- 916 Gorman, G.S., Chinnery, P.F., DiMauro, S., Hirano, M., Koga, Y., McFarland, R., Suomalainen,  
917 A., Thorburn, D.R., Zeviani, M., and Turnbull, D.M. (2016). Mitochondrial diseases. *Nat.*  
918 *Rev. Dis. Prim.* *2*, 1–22.
- 919 Grace, H.E., Galdun, P., Lesnefsky, E.J., West, F.D., and Iyer, S. (2019). mRNA Reprogramming  
920 of T8993G Leigh’s Syndrome Fibroblast Cells to Create Induced Pluripotent Stem Cell  
921 Models for Mitochondrial Disorders. *Stem Cells Dev.* *28*, 846–859.
- 922 Grier, J., Hirano, M., Karaa, A., Shepard, E., and Thompson, J.L.P. (2018). Diagnostic odyssey  
923 of patients with mitochondrial disease Results of a survey. *Neurol. Genet.* *4*.
- 924 Harding, A.E., Holt, I.J., Sweeney, M.G., Brockington, M., and Davis, M.B. (1992). Prenatal  
925 diagnosis of mitochondrial DNA8993 T→G disease. *Am. J. Hum. Genet.* *50*, 629–633.
- 926 Hattori, T., Hamazaki, T., Kudo, S., and Shintaku, H. (2016). Metabolic Signature of MELAS/Leigh  
927 Overlap Syndrome in Patient-specific Induced Pluripotent Stem Cells Model. *Osaka City*  
928 *Med. J.* *62*, 69–76.
- 929 Hinman, L.M., Sheu, K.-F.R., Baker, A.C., Kim, Y.T., and Blass, J.P. (1989). Deficiency of  
930 pyruvate dehydrogenase complex (PDHC) in Leigh’s disease fibroblasts: An abnormality  
931 in lipoamide dehydrogenase affecting PDHC activation. *Neurology* *39*, 70–70.
- 932 Homem, C.C.F., Repic, M., and Knoblich, J.A. (2015). Proliferation control in neural stem and  
933 progenitor cells. *Nat. Rev. Neurosci.* *16*, 647–659.
- 934 Hříbková, H., Grabiec, M., Klemová, D., Slaninová, I., and Sun, Y.-M. (2018). Five steps to form  
935 neural rosettes: structure and function. *J. Cell Sci.* *131*, jcs206896.
- 936 Huh, T.L., Casazza, J.P., Huh, J.W., Chi, Y.T., and Song, B.J. (1990). Characterization of two  
937 cDNA clones for pyruvate dehydrogenase E1 $\beta$  subunit and its regulation in tricarboxylic  
938 acid cycle-deficient fibroblast. *J. Biol. Chem.* *265*, 13320–13326.
- 939 Inak, G., Lorenz, C., Lisowski, P., Zink, A., Mlody, B., and Prigione, A. (2017). Concise Review:  
940 Induced Pluripotent Stem Cell-Based Drug Discovery for Mitochondrial Disease. *Stem*  
941 *Cells* *35*, 1655–1662.
- 942 Inak, G., Rybak-Wolf, A., Lisowski, P., Juettner, R., Zink, A., Mlody, B., Glazar, P., Secker, C.,  
943 Ciptasari, U.H., Stenzel, W., et al. (2019). SURF1 mutations causative of Leigh syndrome  
944 impair human neurogenesis. *BioRxiv* 551390.
- 945 Itskovitz-Eldor, J., Schuldiner, M., Karsenti, D., Eden, A., Yanuka, O., Amit, M., Soreq, H., and  
946 Benvenisty, N. (2000). Differentiation of Human Embryonic Stem Cells into Embryoid  
947 Bodies Comprising the Three Embryonic Germ Layers. *Mol. Med.* *6*, 88–95.
- 948 Iyer, S., Bergquist, K., Young, K., Gnaiger, E., Rao, R.R., and Bennett, J.P. (2012). Mitochondrial  
949 Gene Therapy Improves Respiration, Biogenesis, and Transcription in G11778A Leber’s  
950 Hereditary Optic Neuropathy and T8993G Leigh’s Syndrome Cells. *Hum. Gene Ther.* *23*,  
951 647–657.
- 952 Jain, I.H., Zazzeron, L., Goli, R., Alexa, K., Schatzman-Bone, S., Dhillon, H., Goldberger, O.,

- 953 Peng, J., Shalem, O., Sanjana, N.E., et al. (2016). Hypoxia as a therapy for mitochondrial  
954 disease. *Science* (80-. ). 352, 54–61.
- 955 Jain, I.H., Zazzeron, L., Goldberger, O., Marutani, E., Wojtkiewicz, G.R., Ast, T., Wang, H.,  
956 Schleifer, G., Stepanova, A., Brepoels, K., et al. (2019). Leigh Syndrome Mouse Model  
957 Can Be Rescued by Interventions that Normalize Brain Hyperoxia, but Not HIF Activation.  
958 *Cell Metab.* 0, 824-832.e3.
- 959 Jernberg, J.N., Bowman, C.E., Wolfgang, M.J., and Scafidi, S. (2017). Developmental regulation  
960 and localization of carnitine palmitoyltransferases (CPTs) in rat brain. *J. Neurochem.* 142,  
961 407–419.
- 962 Kelava, I., and Lancaster, M.A. (2016). Stem Cell Models of Human Brain Development. *Cell*  
963 *Stem Cell* 18, 736–748.
- 964 Khacho, M., Clark, A., Svoboda, D.S., Azzi, J., MacLaurin, J.G., Meghaizel, C., Sesaki, H.,  
965 Lagace, D.C., Germain, M., Harper, M.E., et al. (2016). Mitochondrial Dynamics Impacts  
966 Stem Cell Identity and Fate Decisions by Regulating a Nuclear Transcriptional Program.  
967 *Cell Stem Cell.*
- 968 Lake, N.J., Bird, M.J., Isohanni, P., and Paetau, A. (2015). Leigh syndrome: neuropathology and  
969 pathogenesis. *J. Neuropathol. Exp. Neurol.* 74, 482–492.
- 970 Lake, N.J., Compton, A.G., Rahman, S., and Thorburn, D.R. (2016). Leigh syndrome: One  
971 disorder, more than 75 monogenic causes. *Ann. Neurol.* 79, 190–203.
- 972 Lancaster, M.A., and Knoblich, J.A. (2014). Generation of cerebral organoids from human  
973 pluripotent stem cells. *Nat. Protoc.* 9, 2329–2340.
- 974 Lancaster, M.A., Corsini, N.S., Wolfinger, S., Gustafson, E.H., Phillips, A.W., Burkard, T.R., Otani,  
975 T., Livesey, F.J., and Knoblich, J.A. (2017). Guided self-organization and cortical plate  
976 formation in human brain organoids. *Nat. Publ. Gr.* 35.
- 977 Leigh, D. (1951). Subacute necrotizing encephalomyelopathy in an infant. *J. Neurol. Neurosurg.*  
978 *Psychiatry* 14, 216–221.
- 979 Lorenz, C., Lesimple, P., Bukowiecki, R., Zink, A., Inak, G., Mlody, B., Singh, M., Semtner, M.,  
980 Mah, N., Auré, K., et al. (2017). Human iPSC-Derived Neural Progenitors Are an Effective  
981 Drug Discovery Model for Neurological mtDNA Disorders. *Cell Stem Cell* 20, 659-674.e9.
- 982 Lui, J.H., Hansen, D. V., and Kriegstein, A.R. (2011). Development and evolution of the human  
983 neocortex. *Cell* 146, 18–36.
- 984 Di Lullo, E., and Kriegstein, A.R. (2017). The use of brain organoids to investigate neural  
985 development and disease. *Nat. Rev. Neurosci.* 18, 573–584.
- 986 Ma, H., Folmes, C.D.L., Wu, J., Morey, R., Mora-Castilla, S., Ocampo, A., Ma, L., Poulton, J.,  
987 Wang, X., Ahmed, R., et al. (2015). Metabolic rescue in pluripotent cells from patients with  
988 mtDNA disease. *Nature* 524, 234–238.
- 989 Manoli, I., and Venditti, C.P. (2016). Disorders of branched chain amino acid metabolism. *Transl.*  
990 *Sci. Rare Dis.* 1, 91–110.
- 991 Mathieu, J., and Ruohola-Baker, H. (2017). Metabolic remodeling during the loss and acquisition  
992 of pluripotency. *Dev.* 144, 541–551.
- 993 Medelnik, J.-P., Roensch, K., Okawa, S., del Sol, A., Chara, O., Mchedlishvili, L., and Tanaka,  
994 E.M. (2018). Signaling-Dependent Control of Apical Membrane Size and Self-Renewal in  
995 Rosette-Stage Human Neuroepithelial Stem Cells. *Stem Cell Reports* 10, 1751–1765.
- 996 Di Meo, I., Marchet, S., Lamperti, C., Zeviani, M., and Viscomi, C. (2017). AAV9-based gene  
997 therapy partially ameliorates the clinical phenotype of a mouse model of Leigh syndrome.  
998 *Gene Ther.* 24, 661–667.
- 999 Miyabayashi, S., Ito, T., Narisawa, K., Iinuma, K., and Tada, K. (1985). Biochemical study in 28  
1000 children with lactic acidosis, in relation to Leigh's encephalomyelopathy. *Eur. J. Pediatr.*  
1001 143, 278–283.
- 1002 Müller, F.J., Schuldt, B.M., Williams, R., Mason, D., Altun, G., Papapetrou, E.P., Danner, S.,  
1003 Goldmann, J.E., Herbst, A., Schmidt, N.O., et al. (2011). A bioinformatic assay for

- 1004 pluripotency in human cells. *Nat. Methods* 8, 315–317.
- 1005 Muratore, C.R., Srikanth, P., Callahan, D.G., and Young-Pearse, T.L. (2014). Comparison and  
1006 optimization of hiPSC forebrain cortical differentiation protocols. *PLoS One* 9, e105807.
- 1007 Nakano, C., Takashima, S., and Takeshita, K. (1989). Carnitine concentration during the  
1008 development of human tissues. *Early Hum. Dev.* 19, 21–27.
- 1009 Nesbitt, V., Alston, C.L., Blakely, E.L., Fratter, C., Feeney, C.L., Poulton, J., Brown, G.K., Turnbull,  
1010 D.M., Taylor, R.W., and McFarland, R. (2014). A national perspective on prenatal testing  
1011 for mitochondrial disease. *Eur. J. Hum. Genet.* 22, 1255–1259.
- 1012 Oshida, K., Shimizu, T., Takase, M., Tamura, Y., Shimizu, T., and Yamashiro, Y. (2003). Effects  
1013 of dietary sphingomyelin on central nervous system myelination in developing rats. *Pediatr.*  
1014 *Res.* 53, 589–593.
- 1015 Pampaloni, F., Reynaud, E.G., and Stelzer, E.H.K. (2007). The third dimension bridges the gap  
1016 between cell culture and live tissue. *Nat. Rev. Mol. Cell Biol.* 8, 839–845.
- 1017 Panopoulos, A.D., Yanes, O., Ruiz, S., Kida, Y.S., Diep, D., Tautenhahn, R., Herrerías, A.,  
1018 Batchelder, E.M., Plongthongkum, N., Lutz, M., et al. (2012). The metabolome of induced  
1019 pluripotent stem cells reveals metabolic changes occurring in somatic cell reprogramming.  
1020 *Cell Res.* 22, 168–177.
- 1021 Parikh, S., Goldstein, A., Karaa, A., Koenig, M.K., Anselm, I., Brunel-Guitton, C., Christodoulou,  
1022 J., Cohen, B.H., Dimmock, D., Enns, G.M., et al. (2017). Patient care standards for primary  
1023 mitochondrial disease: A consensus statement from the mitochondrial medicine society.  
1024 *Genet. Med.* 19, 1–18.
- 1025 Paşca, A.M., Sloan, S.A., Clarke, L.E., Tian, Y., Makinson, C.D., Huber, N., Kim, C.H., Park, J.-  
1026 Y., O'Rourke, N.A., Nguyen, K.D., et al. (2015). Functional cortical neurons and astrocytes  
1027 from human pluripotent stem cells in 3D culture. *Nat Methods.* 12, 671–678.
- 1028 Pastores, G.M., Santorelli, F.M., Shanske, S., Gelb, B.D., Fyfe, B., Wolfe, D., and Willner, J.P.  
1029 (1994). Leigh syndrome and hypertrophic cardiomyopathy in an infant with a mitochondrial  
1030 DNA point mutation (T8993G). *Am. J. Med. Genet.* 50, 265–271.
- 1031 Quadrato, G., Brown, J., and Arlotta, P. (2016). The promises and challenges of human brain  
1032 organoids as models of neuropsychiatric disease. *Nat. Med.* 22, 1220–1228.
- 1033 Rahman, J., and Rahman, S. (2018). Mitochondrial medicine in the omics era. *Lancet* 391, 2560–  
1034 2574.
- 1035 Rasmussen, M.L., and Gama, V. (2020). A connection in life and death: The BCL-2 family  
1036 coordinates mitochondrial network dynamics and stem cell fate. In *International Review of*  
1037 *Cell and Molecular Biology*, (Elsevier Inc.), p.
- 1038 Rastogi, A., Joshi, P., Contreras, E., and Gama, V. (2019). Remodeling of mitochondrial  
1039 morphology and function: an emerging hallmark of cellular reprogramming. *Cell Stress* 3,  
1040 181–194.
- 1041 Rema, V., Bali, K.K., Ramachandra, R., Chugh, M., Darokhan, Z., and Chaudhary, R. (2008).  
1042 Cytidine-5-diphosphocholine supplement in early life induces stable increase in dendritic  
1043 complexity of neurons in the somatosensory cortex of adult rats. *Neuroscience* 155, 556–  
1044 564.
- 1045 Robel, S., Mori, T., Zoubaa, S., Schlegel, J., Sirko, S., Faissner, A., Goebbels, S., Dimou, L., and  
1046 Götz, M. (2009). Conditional deletion of  $\beta$ 1-integrin in astroglia causes partial reactive  
1047 gliosis. *Glia* 57, 1630–1647.
- 1048 Robel, S., Berninger, B., and Götz, M. (2011). The stem cell potential of glia: Lessons from  
1049 reactive gliosis. *Nat. Rev. Neurosci.* 12, 88–104.
- 1050 Romero-Morales, A.I., O'Grady, B.J., Balotin, K.M., Bellan, L.M., Lippmann, E.S., and Gama, V.  
1051 (2019). Spin $\infty$  an improved miniaturized spinning bioreactor for the generation of human  
1052 cerebral organoids from pluripotent stem cells. *BioRxiv* 687095.
- 1053 Saito, T., Hanai, S., Takashima, S., Nakagawa, E., Okazaki, S., Inoue, T., Miyata, R., Hoshino,  
1054 K., Akashi, T., Sasaki, M., et al. (2011). Neocortical layer formation of human developing



- 1055 brains and lissencephalies: Consideration of layer-specific marker expression. *Cereb.*  
1056 *Cortex* 21, 588–596.
- 1057 Schaefer, A., Lim, A., and Gorman, G. (2019). Epidemiology of Mitochondrial Disease. In  
1058 *Diagnosis and Management of Mitochondrial Disorders*, (Cham: Springer International  
1059 Publishing), pp. 63–79.
- 1060 Schubert, M.B., and Vilarinho, L. (2020). Molecular basis of Leigh syndrome: A current look.  
1061 *Orphanet J. Rare Dis.* 15, 1–14.
- 1062 Shaheen, R., Han, L., Faqeih, E., Ewida, N., Alobeid, E., Phizicky, E.M., and Alkuraya, F.S.  
1063 (2016). A homozygous truncating mutation in PUS3 expands the role of tRNA modification  
1064 in normal cognition. *Hum. Genet.* 135, 707–713.
- 1065 Song, C., Xu, F., Ren, Z., Zhang, Y., Meng, Y., Yang, Y., Lingadahalli, S., Cheung, E., Li, G., Liu,  
1066 W., et al. (2019). Elevated Exogenous Pyruvate Potentiates Mesodermal Differentiation  
1067 through Metabolic Modulation and AMPK/mTOR Pathway in Human Embryonic Stem  
1068 Cells. *Stem Cell Reports* 13, 338–351.
- 1069 Sorbi, S., and Blass, J.P. (1982). Abnormal activation of pyruvate dehydrogenase in Leigh  
1070 disease fibroblasts. *Neurology* 32, 555–558.
- 1071 Steffann, J., Gigarel, N., Corcos, J., Bonnière, M., Encha-Razavi, F., Sinico, M., Prevot, S.,  
1072 Dumez, Y., Yamgnane, A., Frydman, R., et al. (2007). Stability of the m.8993T→G mtDNA  
1073 mutation load during human embryofetal development has implications for the feasibility of  
1074 prenatal diagnosis in NARP syndrome. *J. Med. Genet.* 44, 664–669.
- 1075 Stern, H.J. (1994). Lactic acidosis in paediatrics: Clinical and laboratory evaluation. *Ann. Clin.*  
1076 *Biochem.* 31, 410–419.
- 1077 Takahashi, K., Tanabe, K., Ohnuki, M., Narita, M., Ichisaka, T., Tomoda, K., and Yamanaka, S.  
1078 (2007). Induction of Pluripotent Stem Cells from Adult Human Fibroblasts by Defined  
1079 Factors. *Cell* 131, 861–872.
- 1080 TCW, J., Wang, M., Pimenova, A.A., Bowles, K.R., Hartley, B.J., Lacin, E., Machlovi, S.I.,  
1081 Abdelaal, R., Karch, C.M., Phatnani, H., et al. (2017). An Efficient Platform for Astrocyte  
1082 Differentiation from Human Induced Pluripotent Stem Cells. *Stem Cell Reports* 9, 600–614.
- 1083 The International Stem Cell Initiative (2018). Assessment of established techniques to determine  
1084 developmental and malignant potential of human pluripotent stem cells. *Nat. Commun.* 9,  
1085 1925.
- 1086 Tibbitt, M.W., and Anseth, K.S. (2012). Dynamic microenvironments: The fourth dimension. *Sci.*  
1087 *Transl. Med.* 4, 160ps24-160ps24.
- 1088 Uittenbogaard, M., Brantner, C.A., Fang, Z.S., Wong, L.J.C., Gropman, A., and Chiaramello, A.  
1089 (2018). Novel insights into the functional metabolic impact of an apparent de novo  
1090 m.8993T>G variant in the MT-ATP6 gene associated with maternally inherited form of  
1091 Leigh Syndrome. *Mol. Genet. Metab.* 124, 71–81.
- 1092 Vescovi, A.L., and Snyder, E.Y. (1999). Establishment and properties of neural stem cell clones:  
1093 Plasticity in vitro and in vivo. In *Brain Pathology*, (International Society of Neuropathology),  
1094 pp. 569–598.
- 1095 Vorstman, J.A.S., Turetsky, B.I., Sijmens-Morcus, M.E.J., De Sain, M.G., Dorland, B., Sprong,  
1096 M., Rappaport, E.F., Beemer, F.A., Emanuel, B.S., Kahn, R.S., et al. (2009). Proline affects  
1097 brain function in 22q11DS children with the low activity COMT158 allele.  
1098 *Neuropsychopharmacology* 34, 739–746.
- 1099 White, S.L., Collins, V.R., Wolfe, R., Cleary, M.A., Shanske, S., DiMauro, S., Dahl, H.H.M., and  
1100 Thorburn, D.R. (1999). Genetic counseling and prenatal diagnosis for the mitochondrial  
1101 DNA mutations at nucleotide 8993. *Am. J. Hum. Genet.* 65, 474–482.
- 1102 Wilson, P.G., and Stice, S.S. (2006). Development and differentiation of neural rosettes derived  
1103 from human embryonic stem cells. *Stem Cell Rev.* 2, 67–77.
- 1104 Wu, J., Ocampo, A., and Belmonte, J.C.I. (2016). Cellular Metabolism and Induced Pluripotency.  
1105 *Cell* 166, 1371–1385.

- 1106 Xia, J., and Wishart, D.S. (2010). MetPA: a web-based metabolomics tool for pathway analysis  
1107 and visualization. *Bioinformatics* 26, 2342–2344.
- 1108 Xia, J., and Wishart, D.S. (2011a). Metabolomic data processing, analysis, and interpretation  
1109 using MetaboAnalyst. *Curr. Protoc. Bioinforma.* 34, 1–48.
- 1110 Xia, J., and Wishart, D.S. (2011b). Web-based inference of biological patterns, functions and  
1111 pathways from metabolomic data using MetaboAnalyst. *Nat. Protoc.* 6, 743–760.
- 1112 Xia, J., Psychogios, N., Young, N., and Wishart, D.S. (2009). MetaboAnalyst: a web server for  
1113 metabolomic data analysis and interpretation. *Nucleic Acids Res.* 37, W652–W660.
- 1114 Zanutelli, M.R., Goldblatt, Z.E., Miller, J.P., Bordeleau, F., Li, J., VanderBurgh, J.A., Lampi, M.C.,  
1115 King, M.R., and Reinhart-King, C.A. (2018). Regulation of ATP utilization during metastatic  
1116 cell migration by collagen architecture. *Mol. Biol. Cell* 29, 1–9.
- 1117 Zanutelli, M.R., Rahman-Zaman, A., VanderBurgh, J.A., Taufalele, P. V., Jain, A., Erickson, D.,  
1118 Bordeleau, F., and Reinhart-King, C.A. (2019). Energetic costs regulated by cell mechanics  
1119 and confinement are predictive of migration path during decision-making. *Nat. Commun.*  
1120 10, 1–12.
- 1121 Zeisel, S.H. (2006). The fetal origins of memory: The role of dietary choline in optimal brain  
1122 development. *J. Pediatr.* 149, S131–S136.
- 1123 Zeisel, S.H., and Niculescu, M.D. (2006). Perinatal Choline Influences Brain Structure and  
1124 Function. *Nutr. Rev.* 64, 197–203.
- 1125 Zhang, S.-C., Wernig, M., Duncan, I.D., Brüstle, O., and Thomson, J.A. (2001). In vitro  
1126 differentiation of transplantable neural precursors from human embryonic stem cells. *Nat.*  
1127 *Biotechnol.* 19, 1129–1133.
- 1128

bioRxiv preprint doi: <https://doi.org/10.1101/2020.04.21.054361>; this version posted April 22, 2020. The copyright holder for this preprint (which was not certified by peer review) is the author/funder, who has granted bioRxiv a license to display the preprint in perpetuity. It is made available under a [CC-BY-NC-ND 4.0 International license](https://creativecommons.org/licenses/by-nc-nd/4.0/).

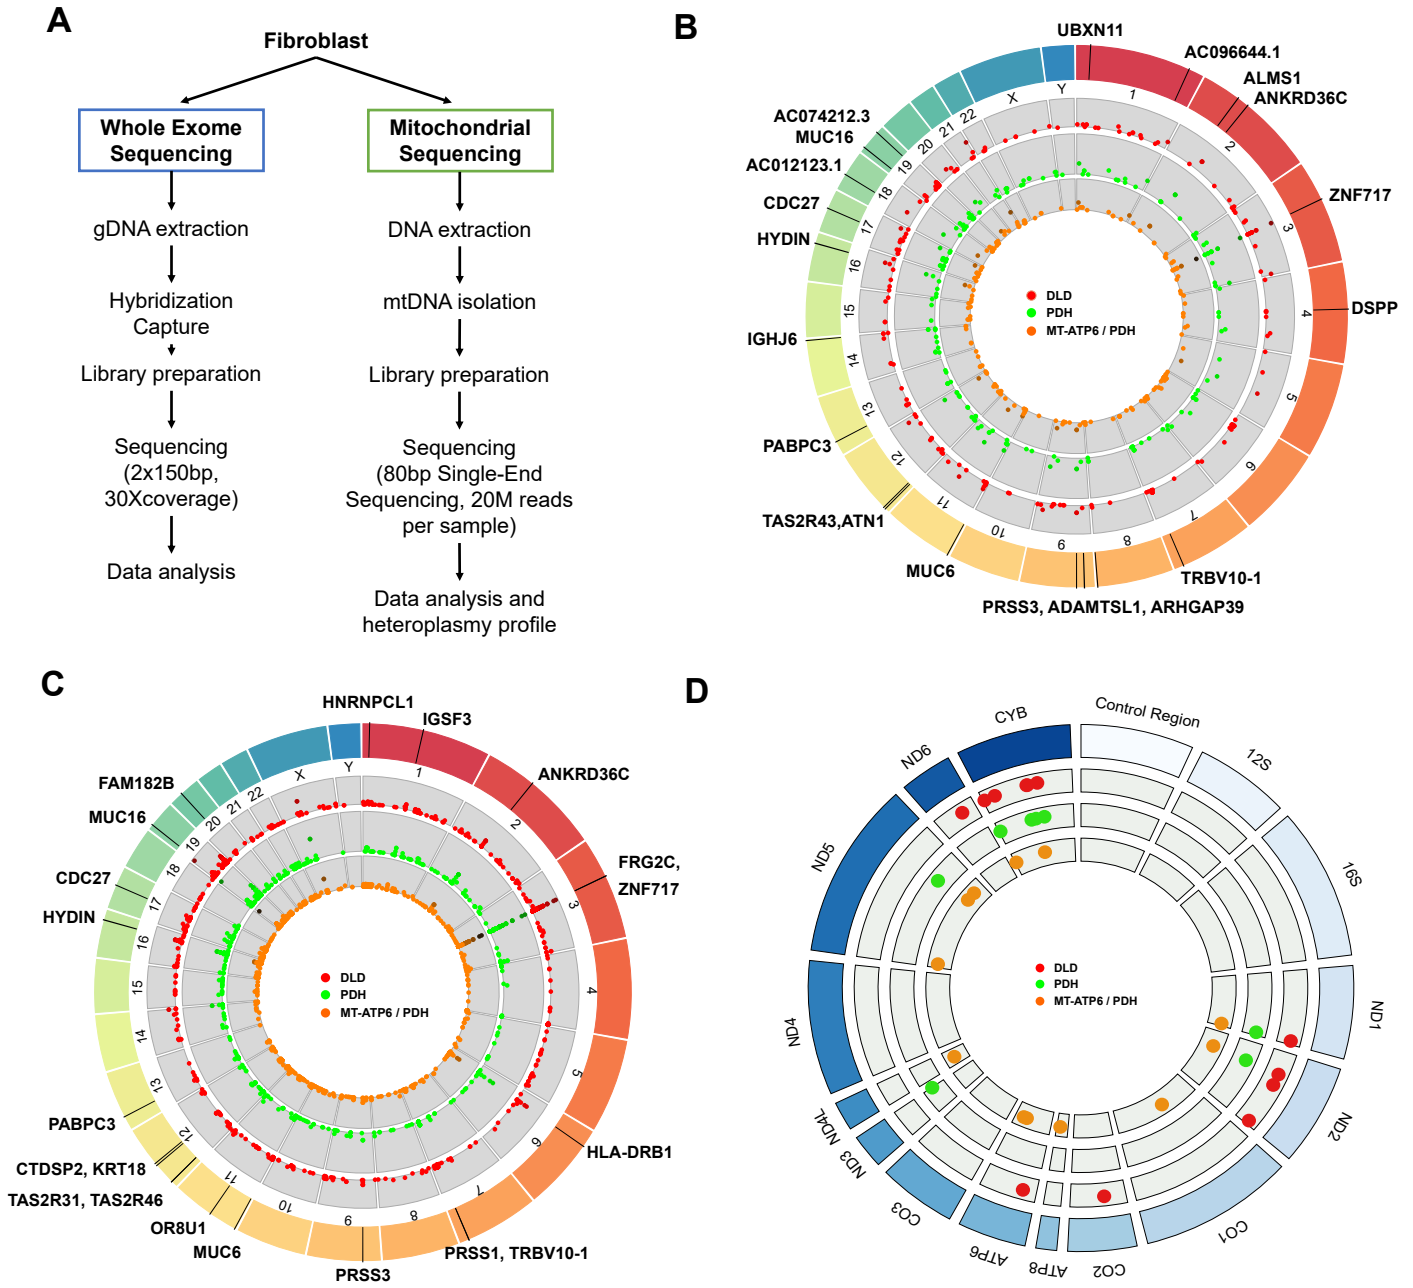

**Figure 2**

bioRxiv preprint doi: <https://doi.org/10.1101/2020.04.21.054361>; this version posted April 22, 2020. The copyright holder for this preprint (which was not certified by peer review) is the author/funder, who has granted bioRxiv a license to display the preprint in perpetuity. It is made available under aCC-BY-NC-ND 4.0 International license.

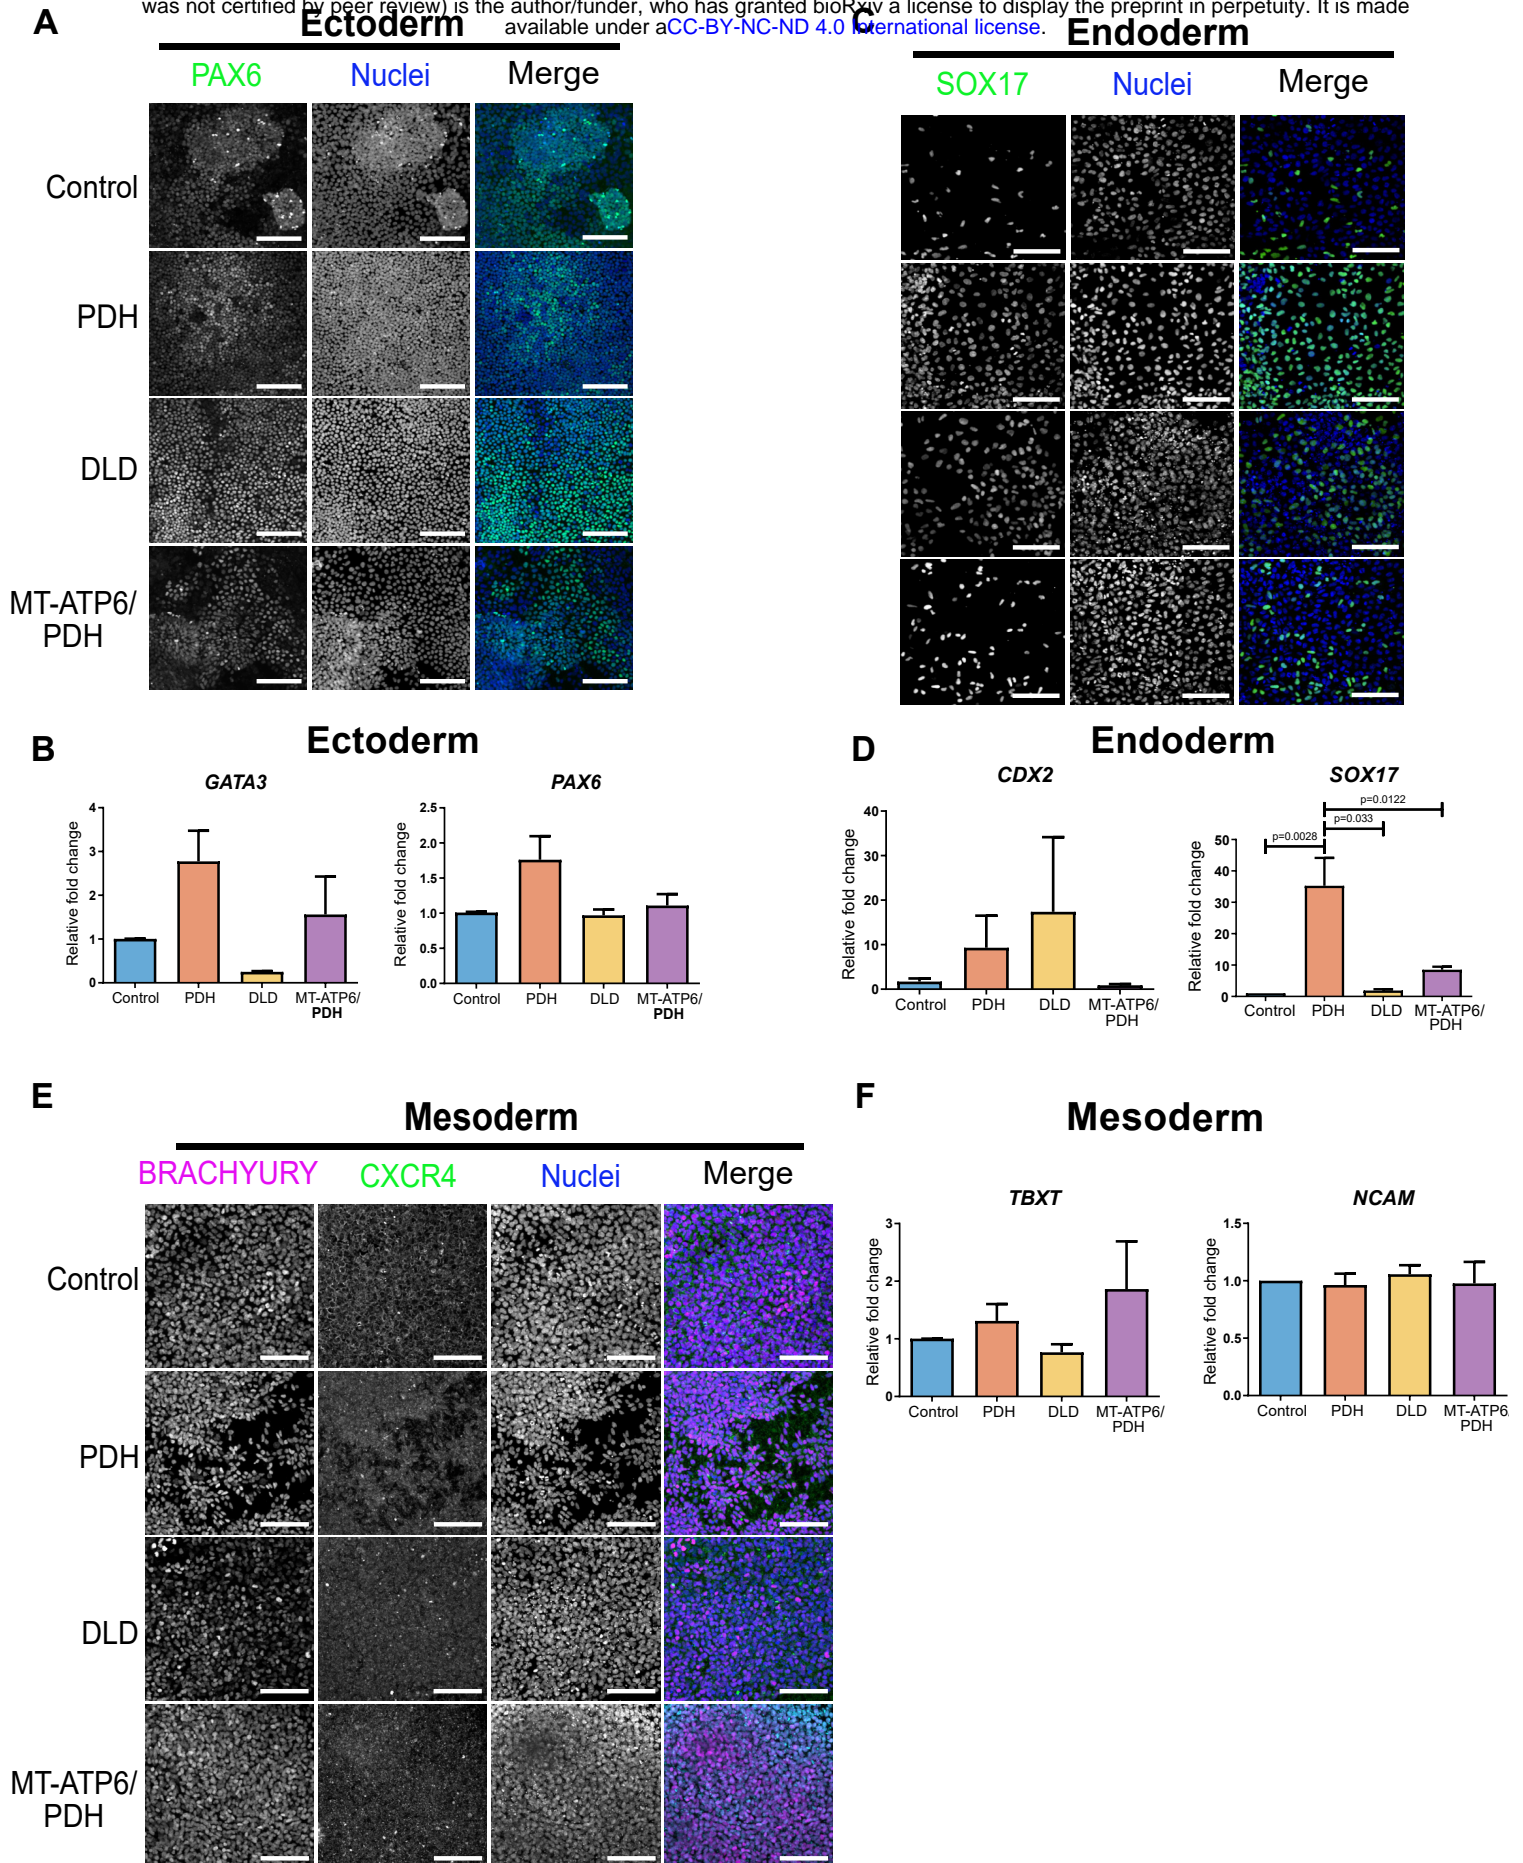

**Figure 3**

bioRxiv preprint doi: <https://doi.org/10.1101/2020.04.21.054361>; this version posted April 22, 2020. The copyright holder for this preprint (which was not certified by peer review) is the author/funder, who has granted bioRxiv a license to display the preprint in perpetuity. It is made available under aCC-BY-NC-ND 4.0 International license.

**A**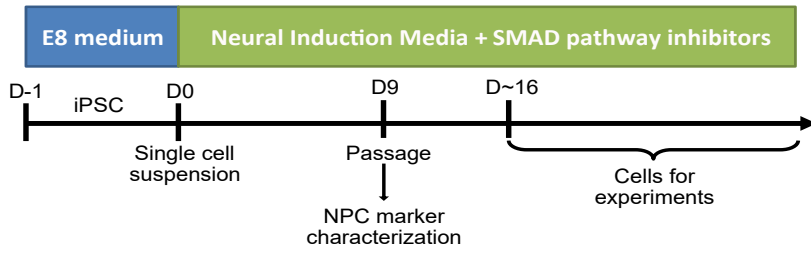**B**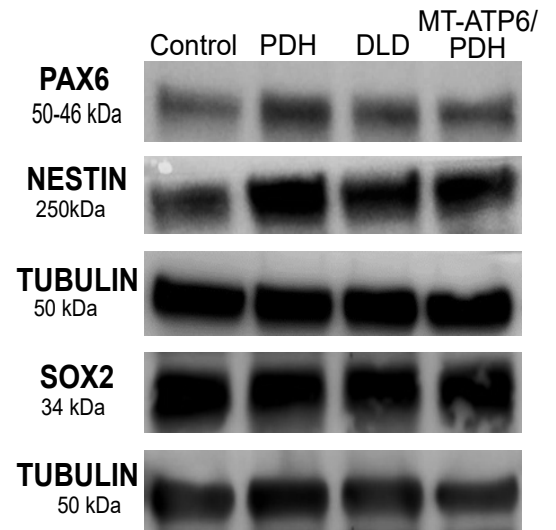**C**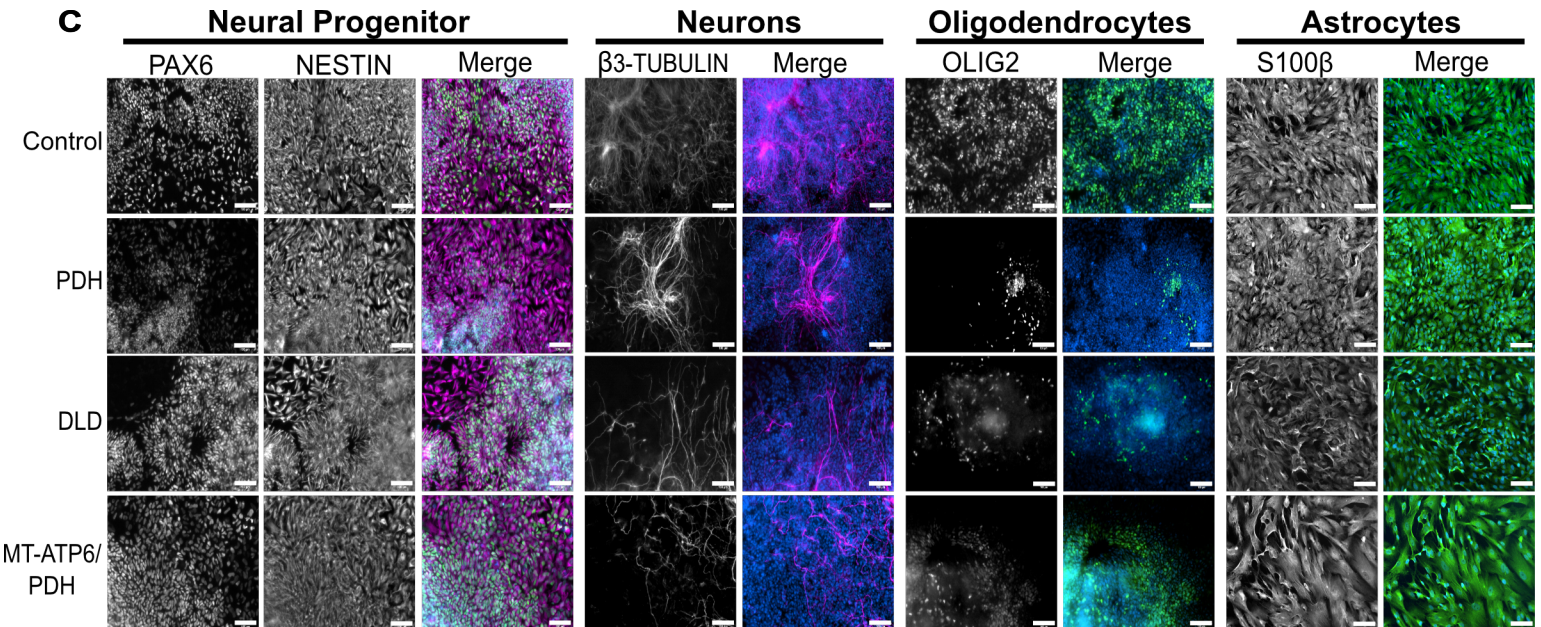**D**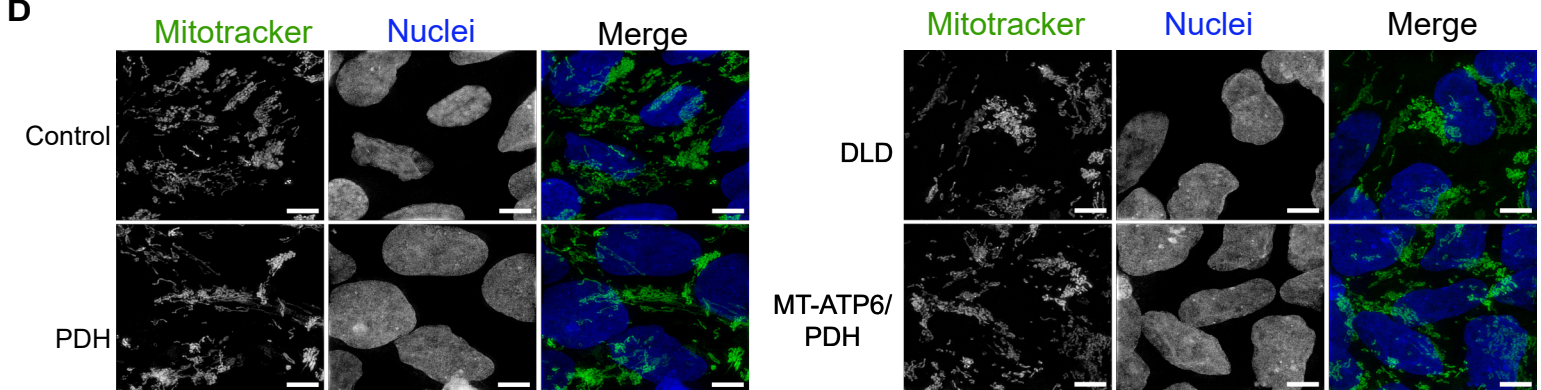

bioRxiv preprint doi: <https://doi.org/10.1101/2020.04.21.054361>; this version posted April 22, 2020. The copyright holder for this preprint (which was not certified by peer review) is the author/funder, who has granted bioRxiv a license to display the preprint in perpetuity. It is made available under aCC-BY-NC-ND 4.0 International license.

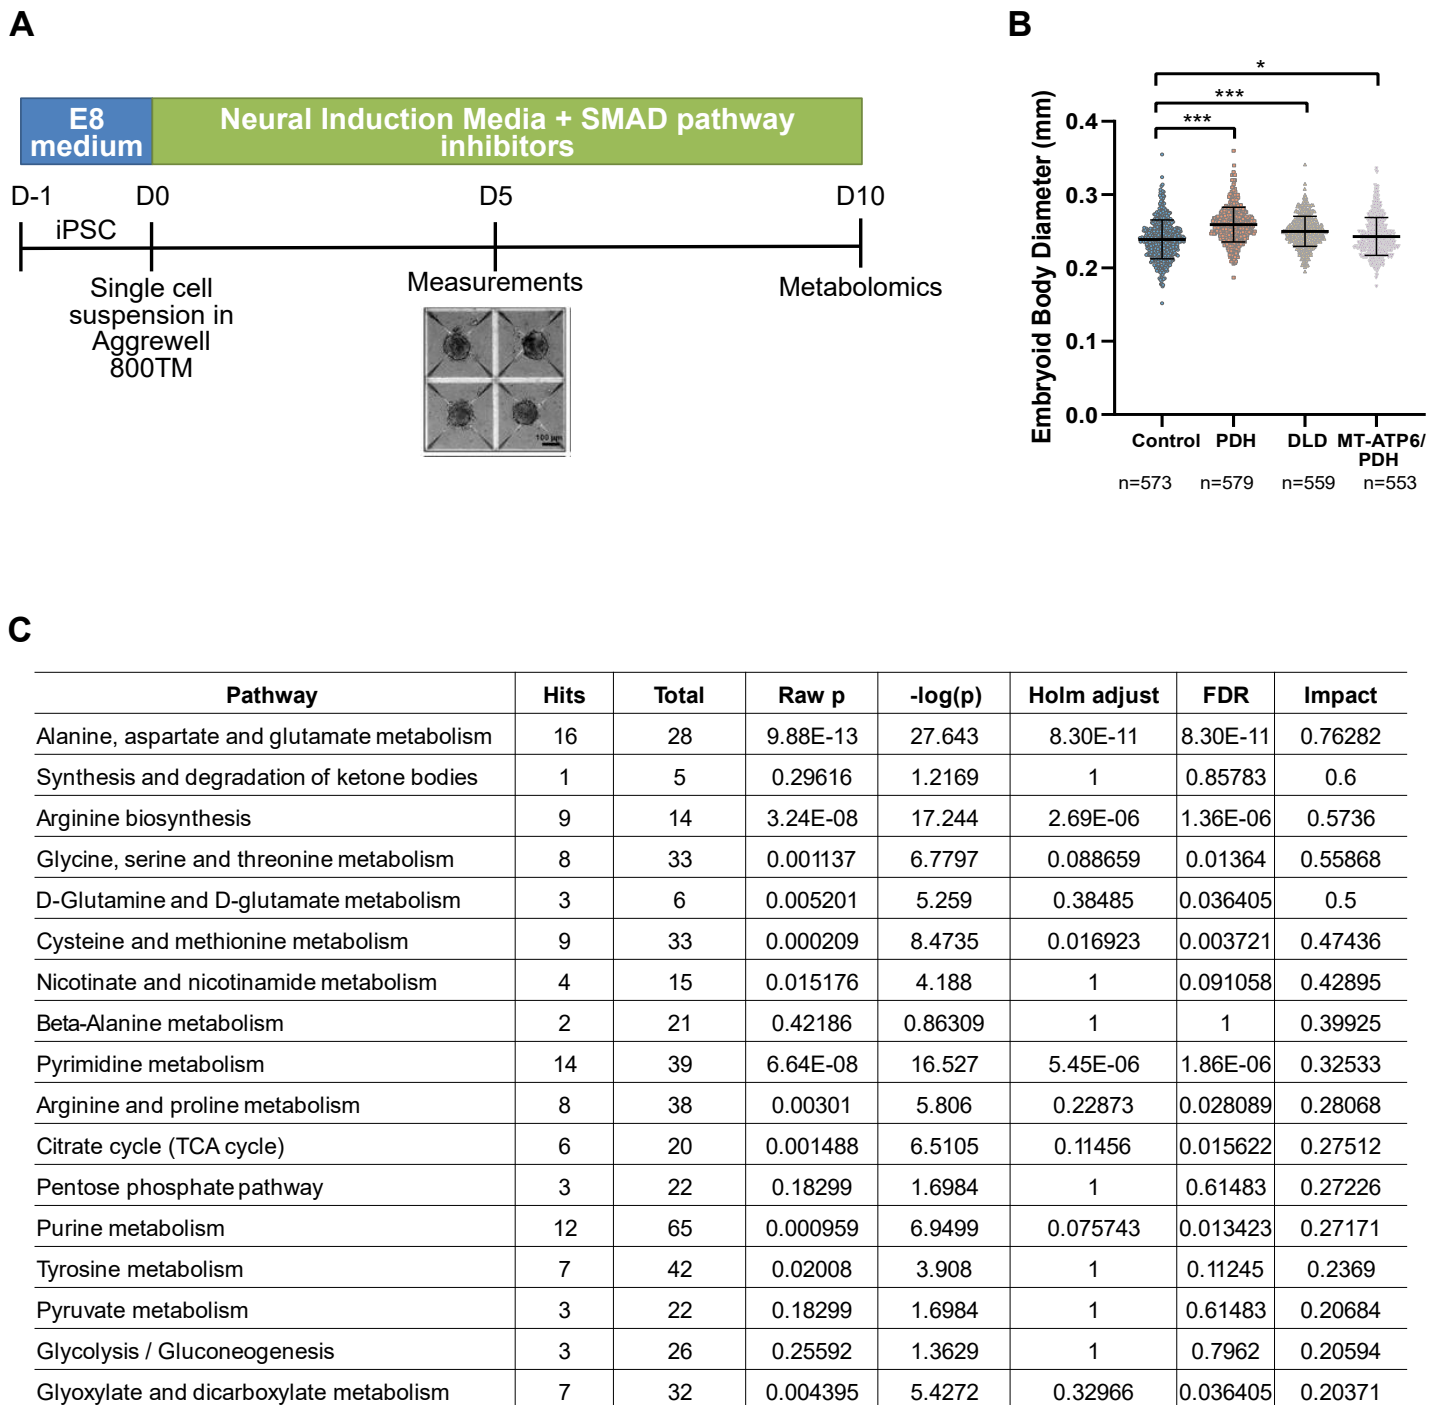

bioRxiv preprint doi: <https://doi.org/10.1101/2020.04.21.054361>; this version posted April 22, 2020. The copyright holder for this preprint (which was not certified by peer review) is the author/funder, who has granted bioRxiv a license to display the preprint in perpetuity. It is made available under aCC-BY-NC-ND 4.0 International license.

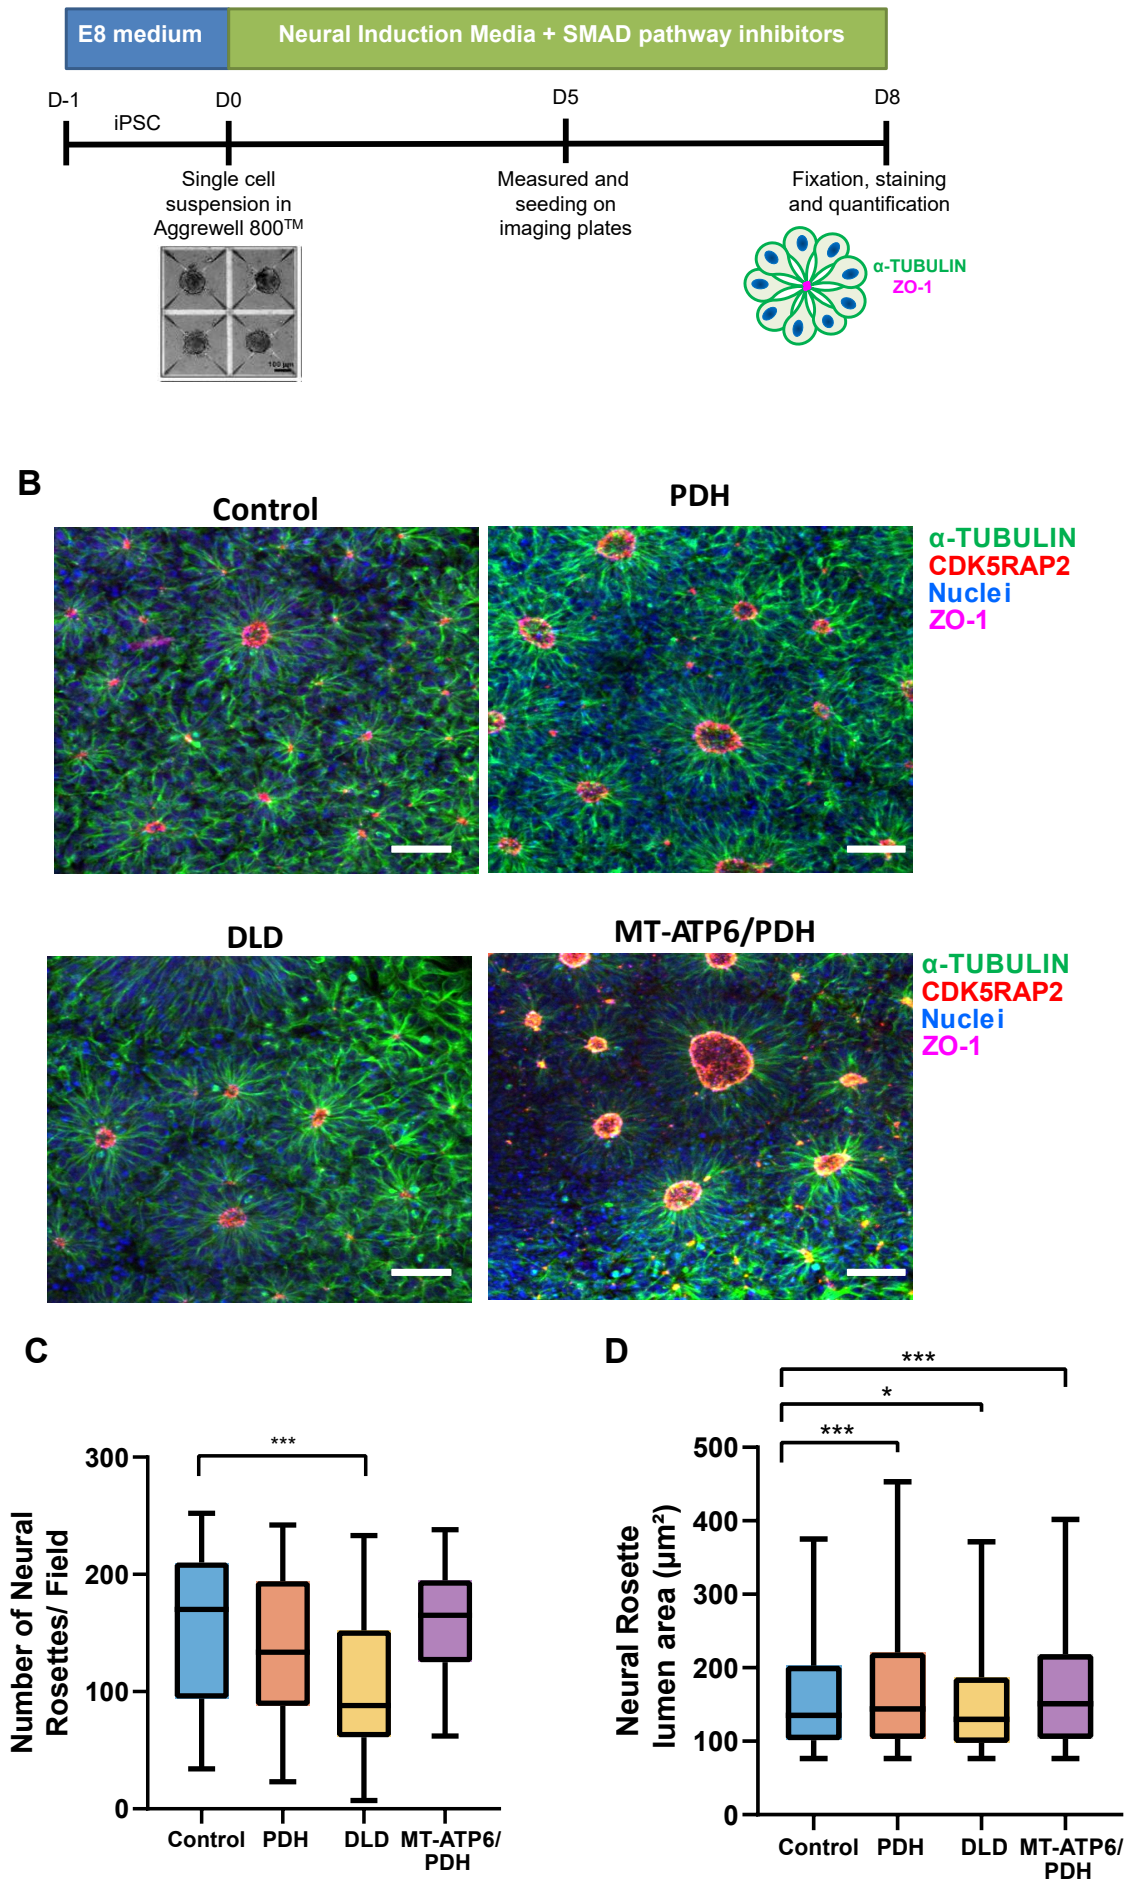

**Figure 6**

**A** bioRxiv preprint doi: <https://doi.org/10.1101/2020.04.21.054361>; this version posted April 22, 2020. The copyright holder for this preprint (which was not certified by peer review) is the author/funder, who has granted bioRxiv a license to display the preprint in perpetuity. It is made available under aCC-BY-NC-ND 4.0 International license.

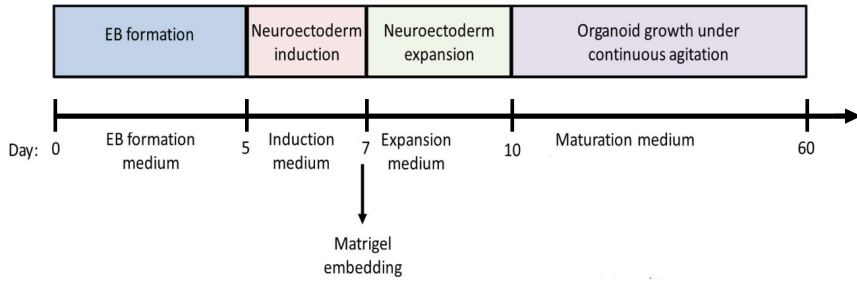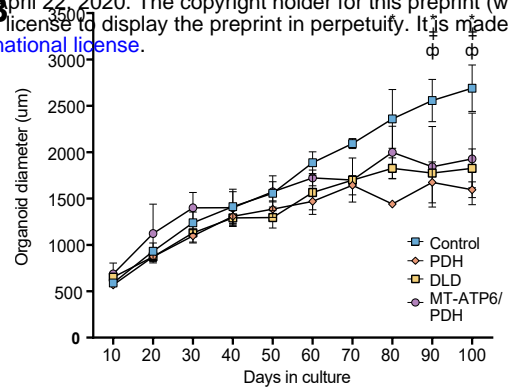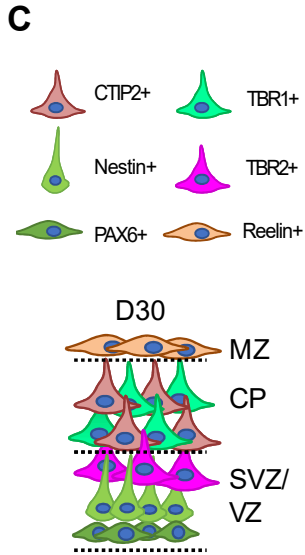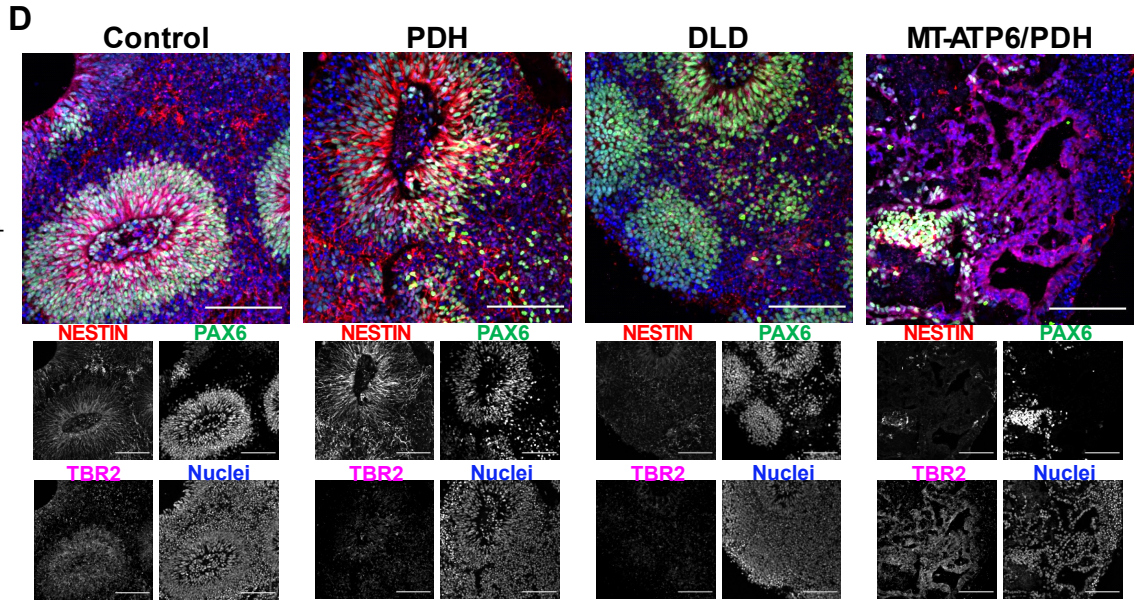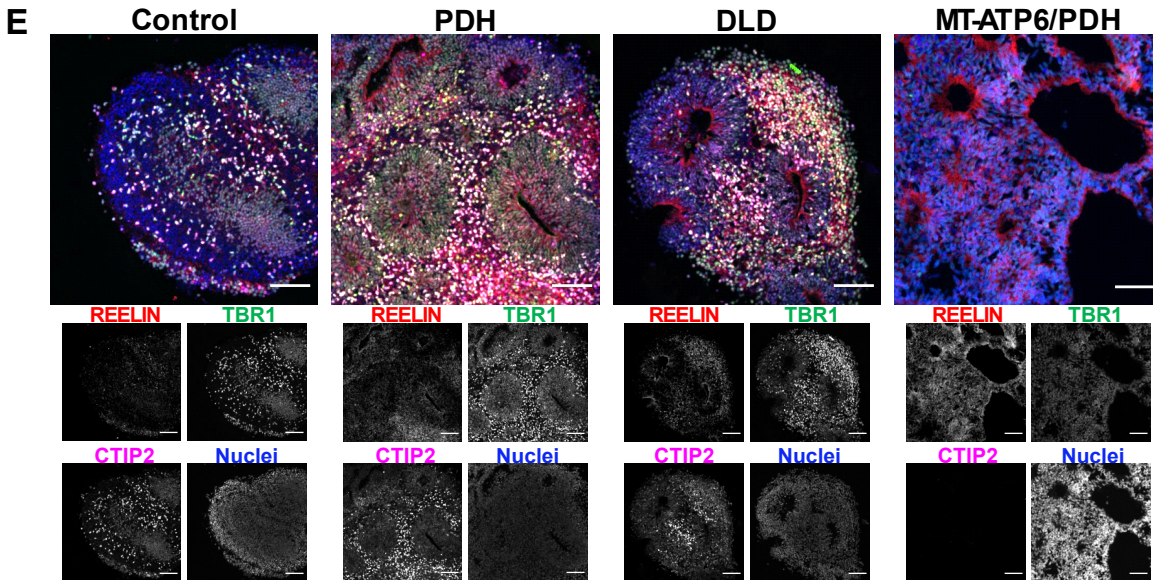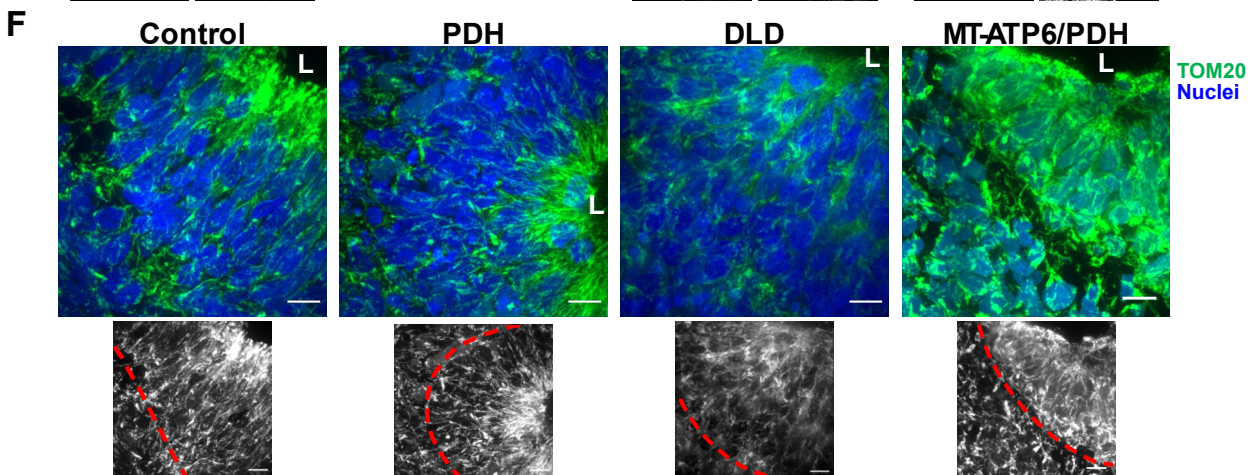



bioRxiv preprint doi: <https://doi.org/10.1101/2020.04.21.054361>; this version posted April 22, 2020. The copyright holder for this preprint (which was not certified by peer review) is the author/funder, who has granted bioRxiv a license to display the preprint in perpetuity. It is made available under aCC-BY-NC-ND 4.0 International license.

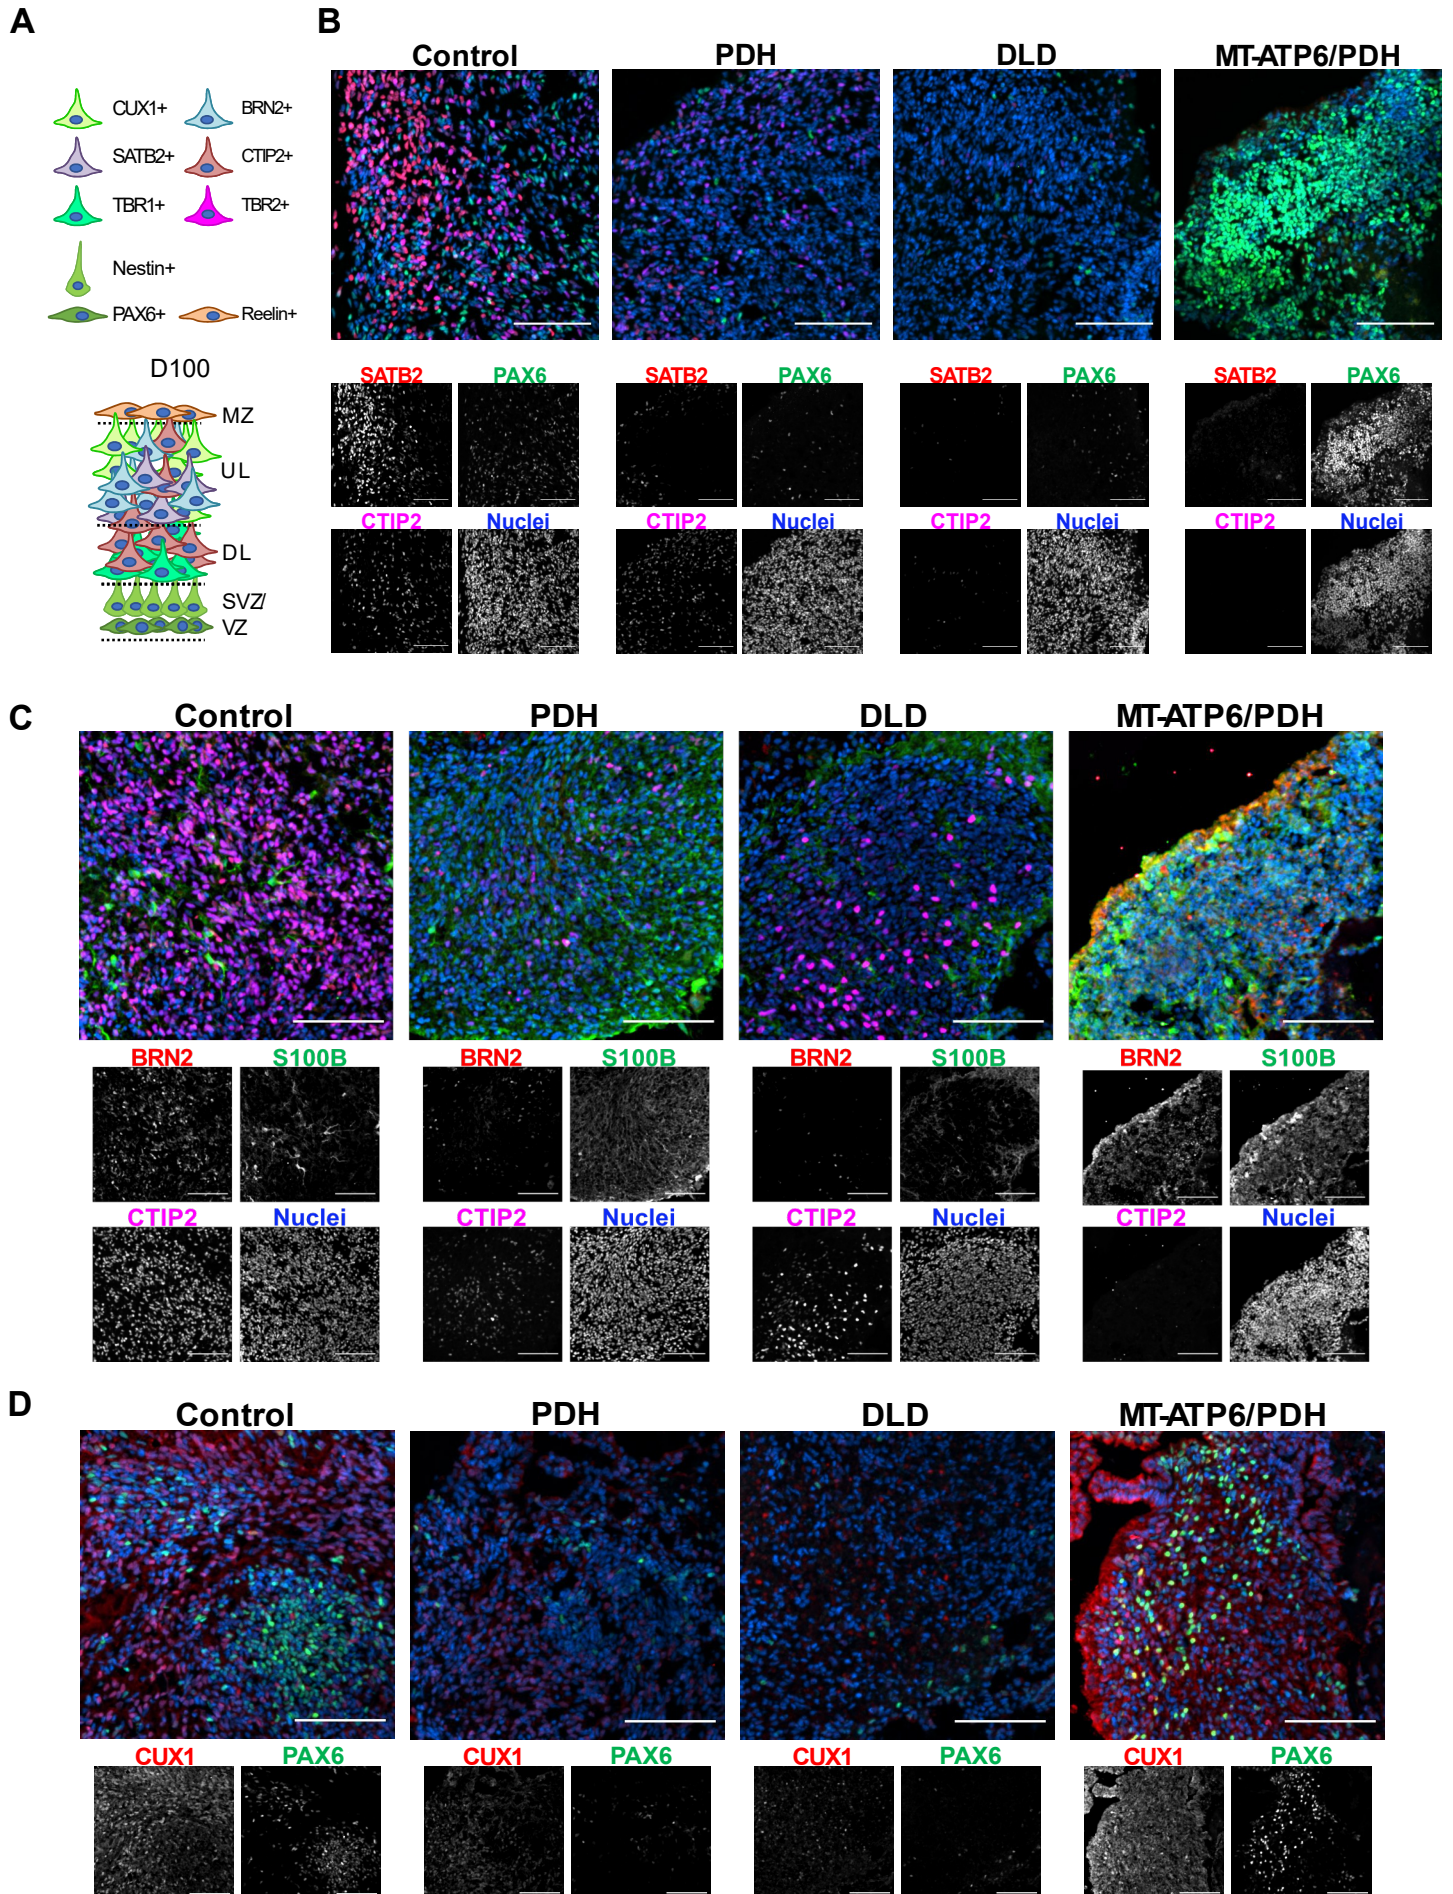

Source: https://www.biorxiv.org/content/10.1101/2020.04.21.054361v1.full.pdf
